# Supplementary material for: Effect of alkali ions on optical properties of flavins: vibronic spectra of cryogenic M+lumichrome ions (M = Li–Cs) in the gas phase
Source: Royal Society of Chemistry journal article supplement (doi:10.1039/c8cp03950j), 2018-01-01
Supplement: c8cp03950j1.pdf [file c8cp03950j1.pdf]

## Electronic Supplementary Information (ESI)

### Effect of alkali ions on optical properties of flavins: Vibronic spectra of cryogenic $M^+$ lumichrome ions ( $M=Li-Cs$ ) in the gas phase

Pablo Nieto,<sup>a</sup> David Müller,<sup>a</sup> Alexander Sheldrick,<sup>a</sup> Alan Günther,<sup>a</sup> Mitsuhiro Miyazaki,<sup>a,b</sup> and Otto Dopfer<sup>a\*</sup>

<sup>a</sup> Institut für Optik und Atomare Physik, Technische Universität Berlin, Hardenbergstr. 36, D-10623 Berlin, Germany

<sup>b</sup> Laboratory for Chemistry and Life Science, Institute of Innovative Research, Tokyo Institute of Technology, 4259, Nagatsuta-cho, Midori-ku, Yokohama, Japan

\* corresponding author: dopfer@physik.tu-berlin.de; Fax: +49 30 314 23018

**Figure S1.** Experimental VISPD spectra of the  $S_1 \leftarrow S_0$  transition of  $M^+LC$  ( $M=H, Li-Cs$ ). The spectra of  $H^+LC$  and  $Li^+LC$  are recorded with the OPO laser, while the dye laser is used for the spectra of  $M^+LC$  with  $M=Na-Cs$ .

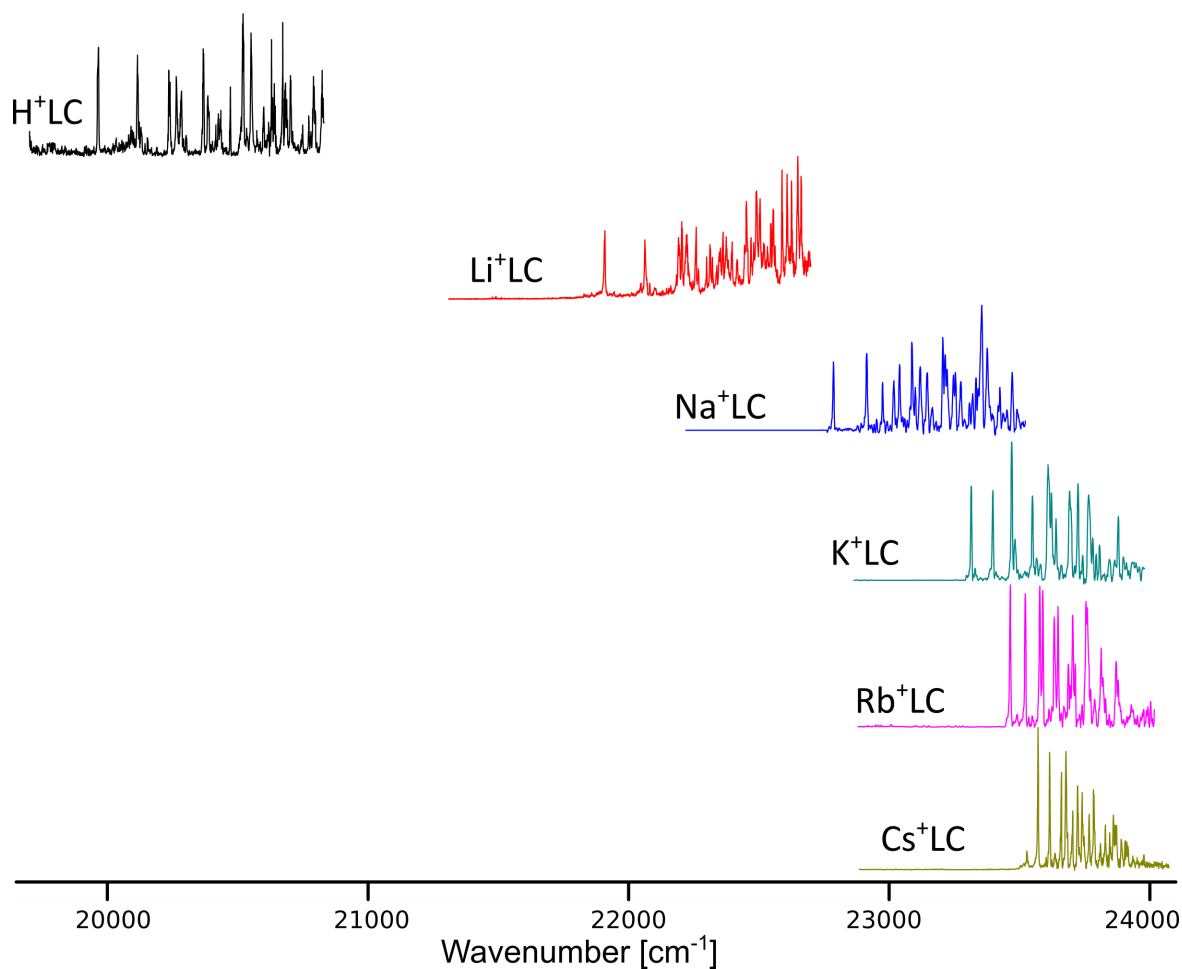

**Figure S2.** Experimental VISPD spectra of the  $S_1 \leftarrow S_0$  transition of  $Cs^+LC$  recorded for ion trap temperatures of 25, 50, and 100 K. The Franck-Condon analysis of the intensities of the  $S_1$  origin ( $0^0$ ), the hot band and fundamental of the in-plane  $Cs^+ \dots LC$  bend ( $-42$  and  $+45$   $cm^{-1}$ ) yields a vibrational temperature of  $29 \pm 3$  K for a nominal trap temperature measured as  $25 \pm 1$  K.

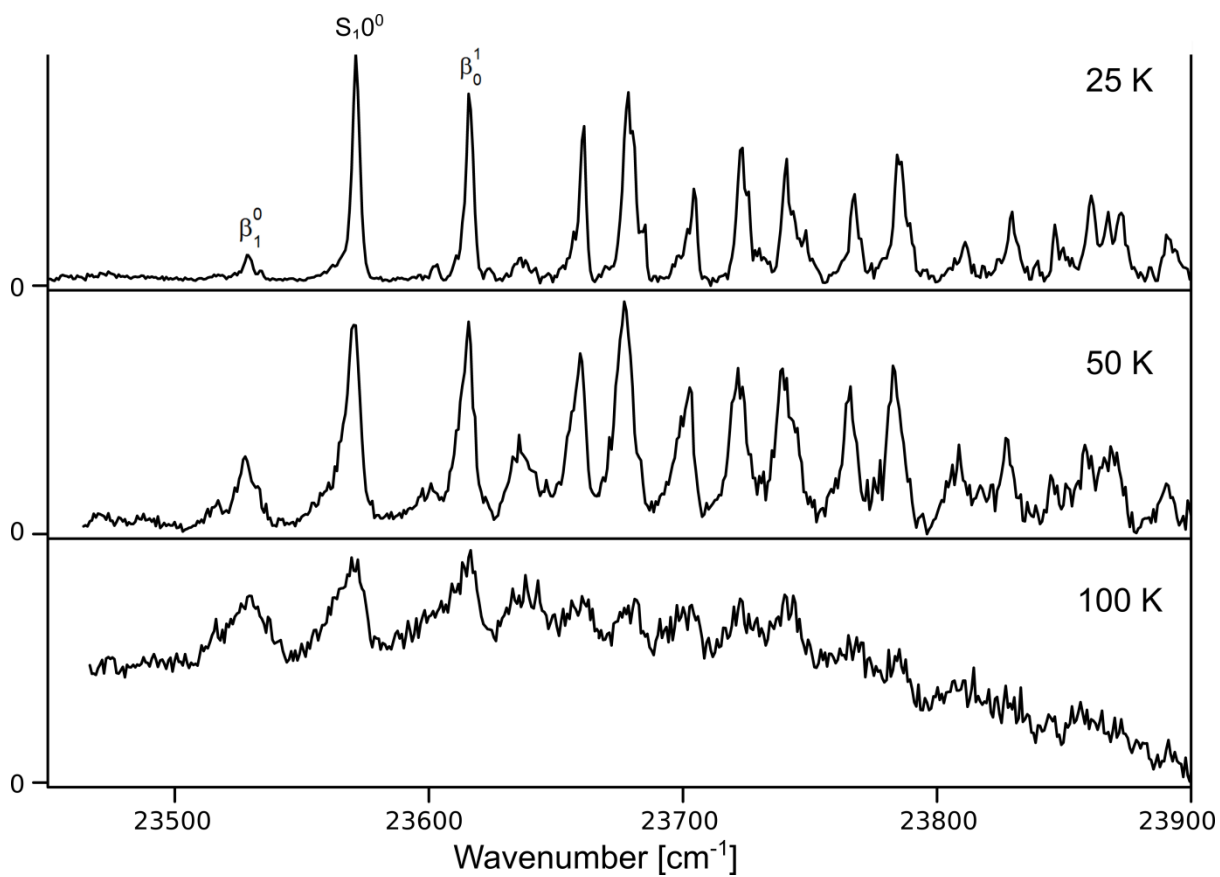

**Figure S3.** Schematic representation of relevant low-frequency in-plane normal coordinates in the  $S_1$  state of  $\text{Cs}^+\text{LC}(\text{O4})$  calculated at the PBE0/cc-pVDZ level. Hydrogen atoms are omitted for the sake of simplicity. Similarly, the metal ion is not shown for vibrations of the LC moiety. Shown are the structures for maximum positive and maximum negative elongation. The arrows indicate major movements. Labels used in Table 3 are indicated.

**(a) modes 53 and 52**

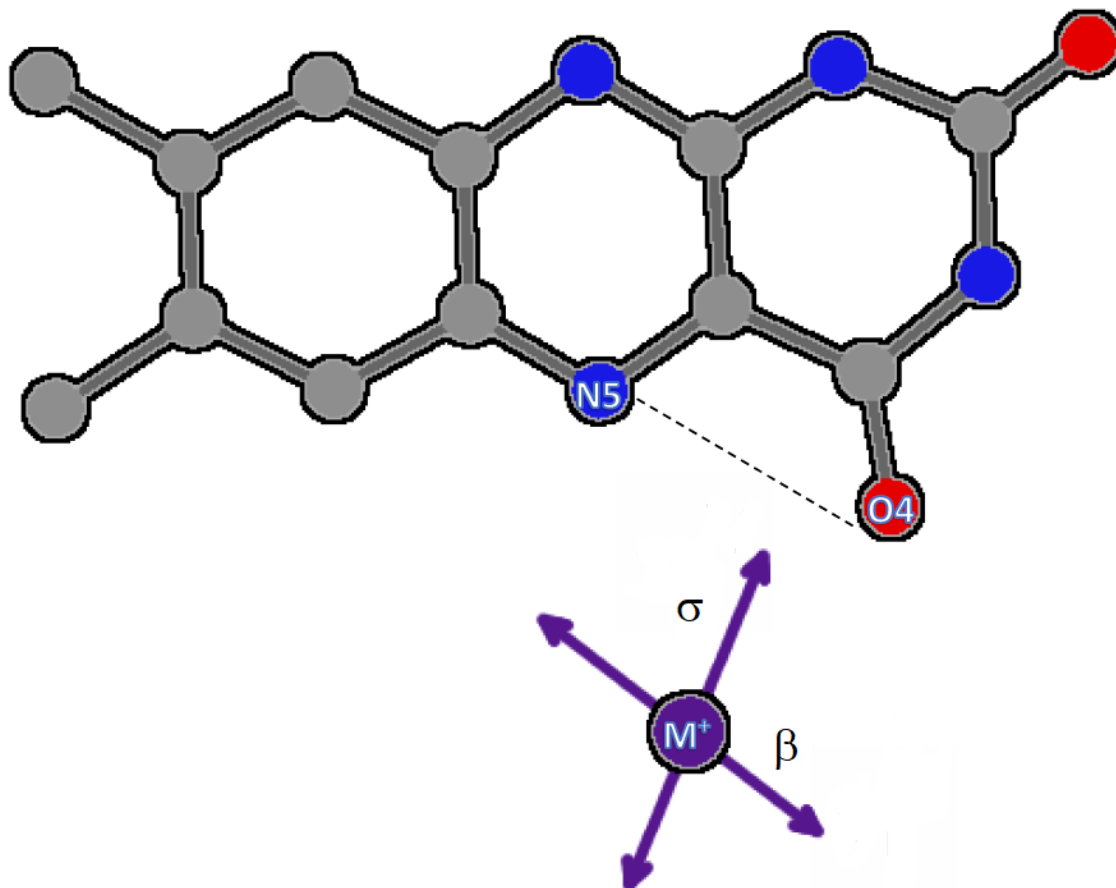

(b) mode 51

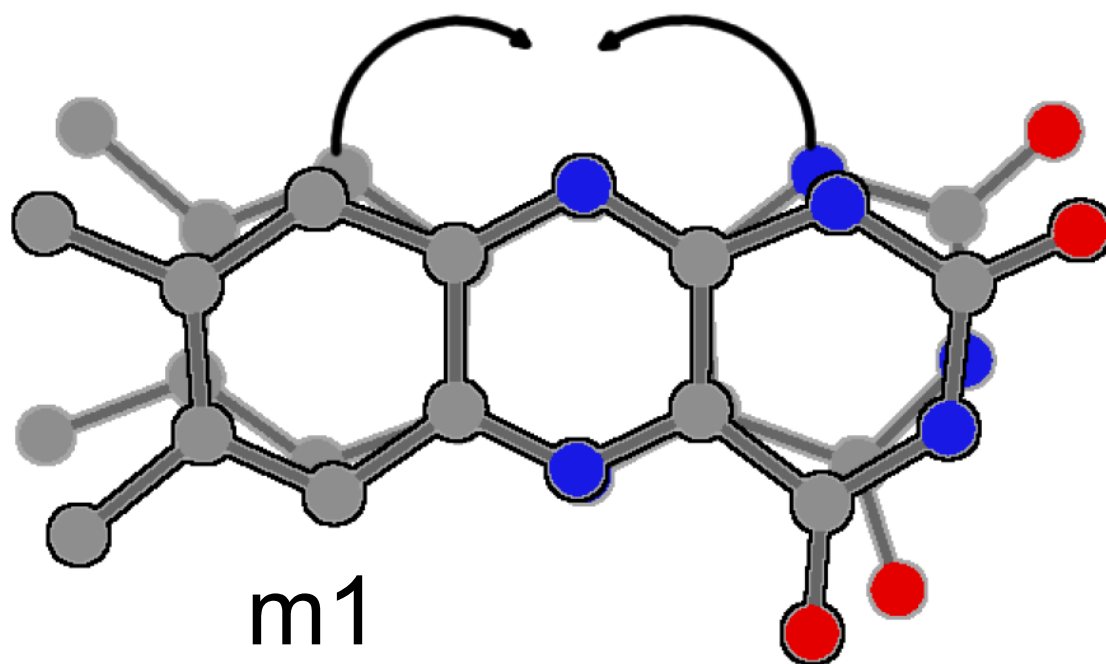

(c) mode 50

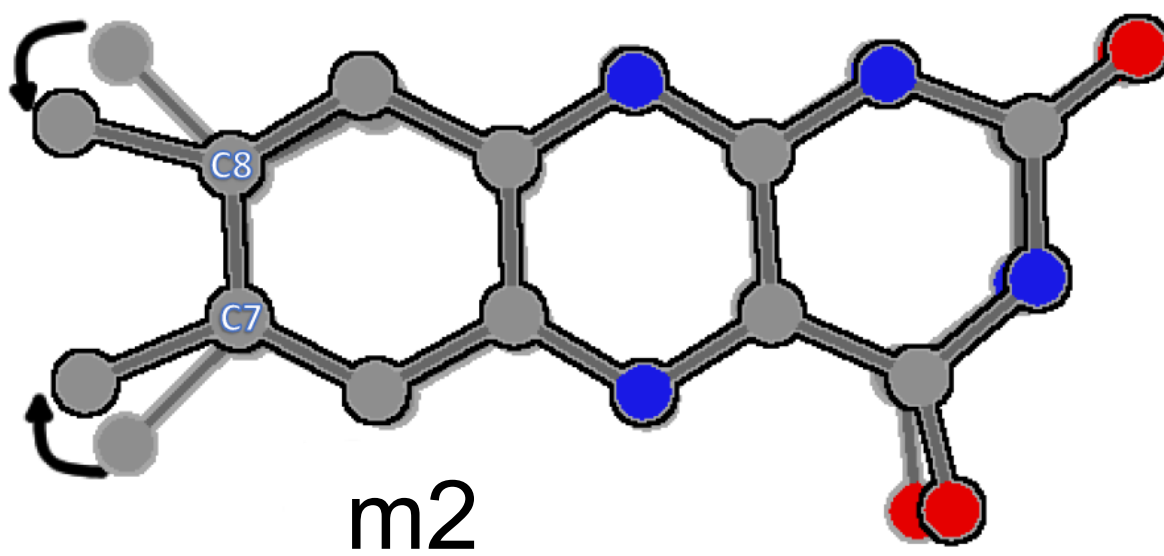



(d) mode 49

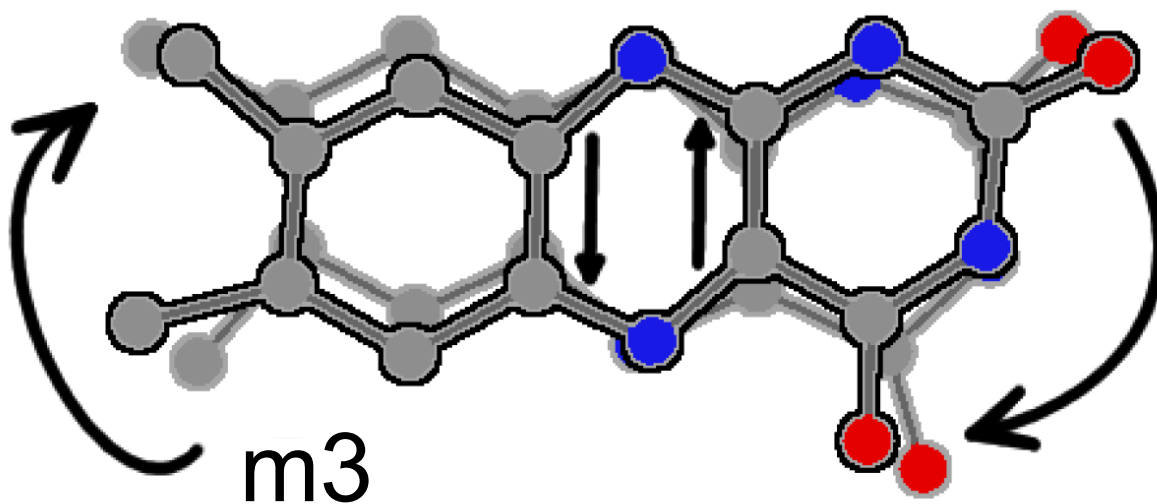

(e) mode 48

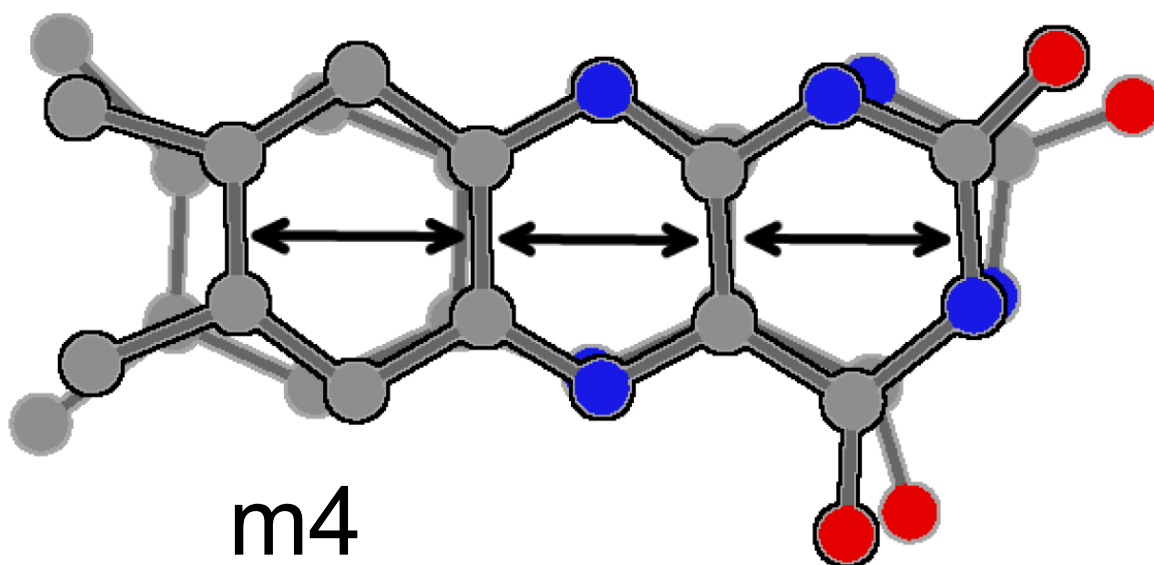

(f) mode 47

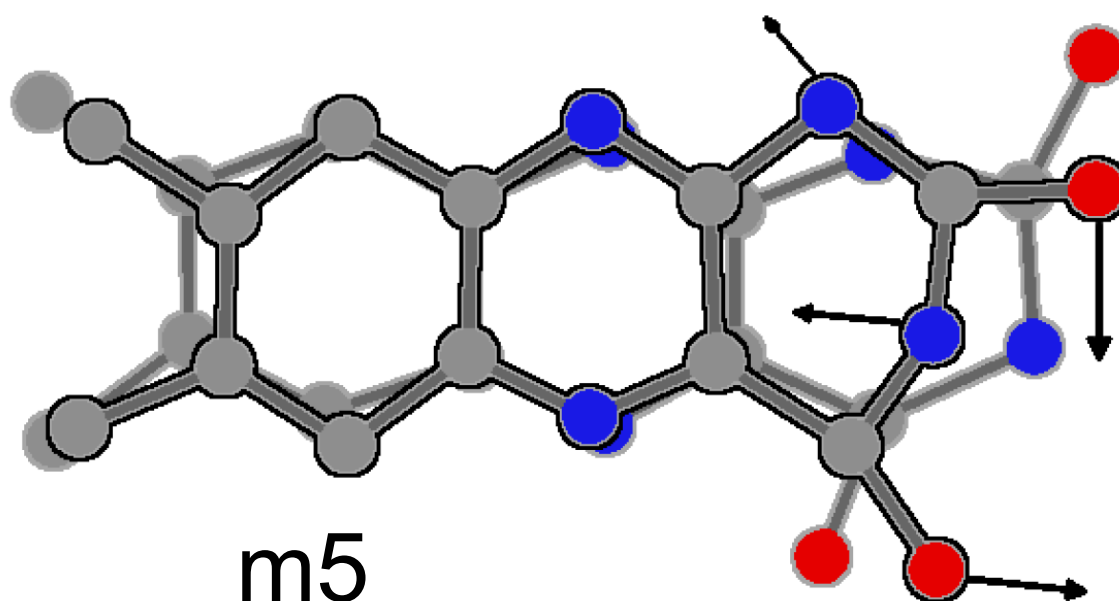

(g) mode 43

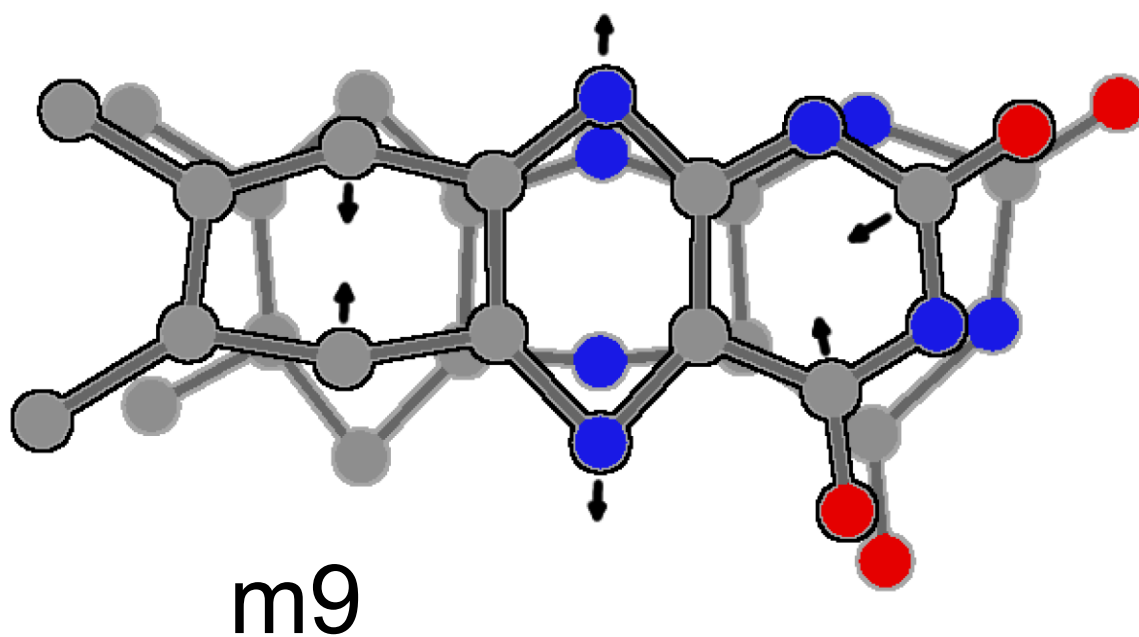

(h) mode 42

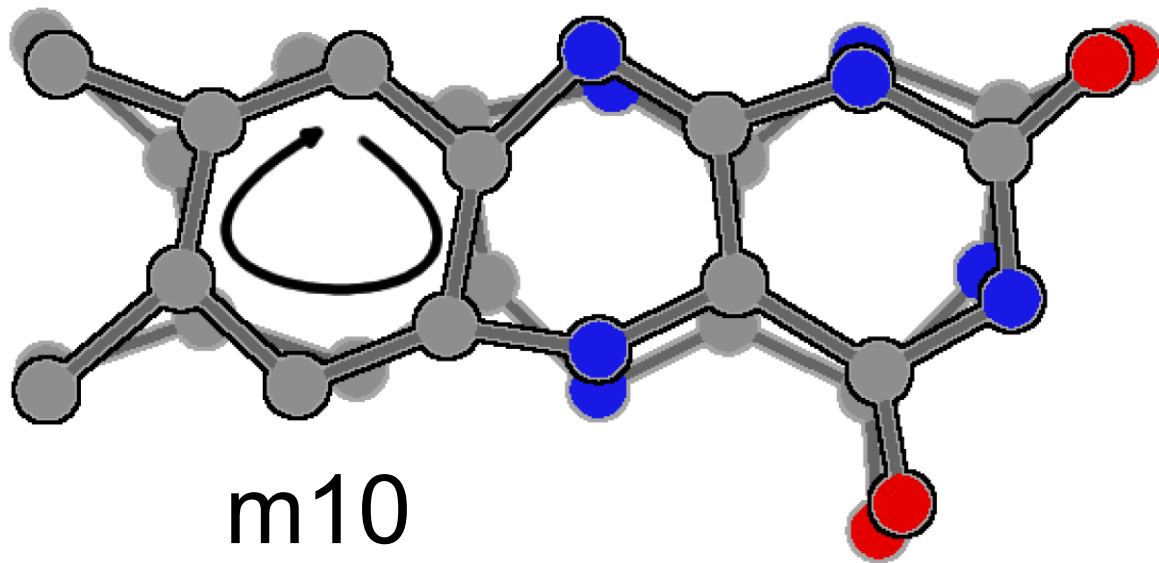

**Figure S4.** Ground state  $S_0$  (top, absolute distances) and  $S_1$  excited state geometries (bottom, distances relative to  $S_0$ ) of  $M^+LC(O4)$  calculated at the PBE0/cc-pVDZ level. All values are given in pm. Positive values correspond to elongations; negative values indicate contractions upon  $S_1$  excitation.

**Na<sup>+</sup>LC(O4)**

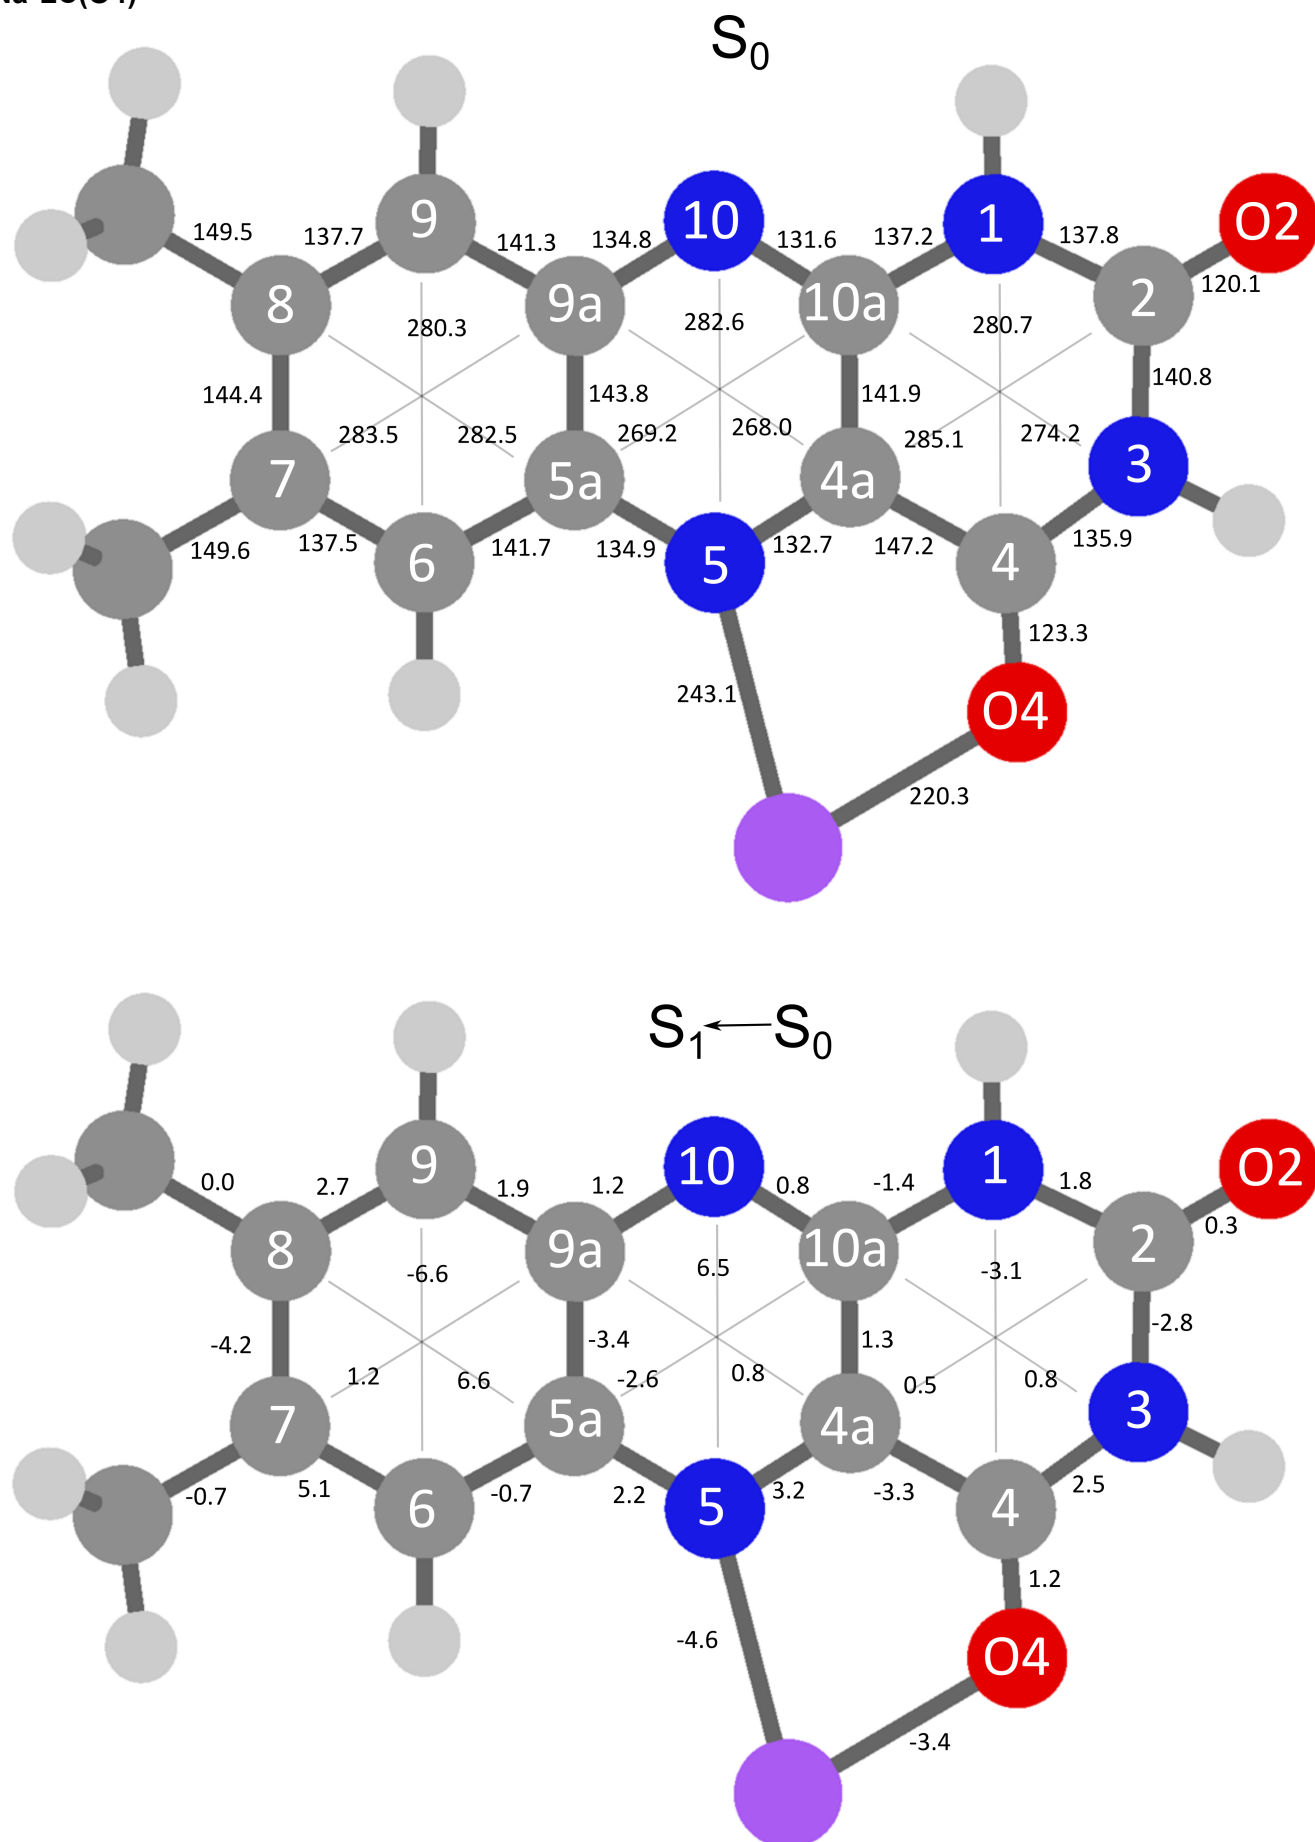

S<sub>0</sub>

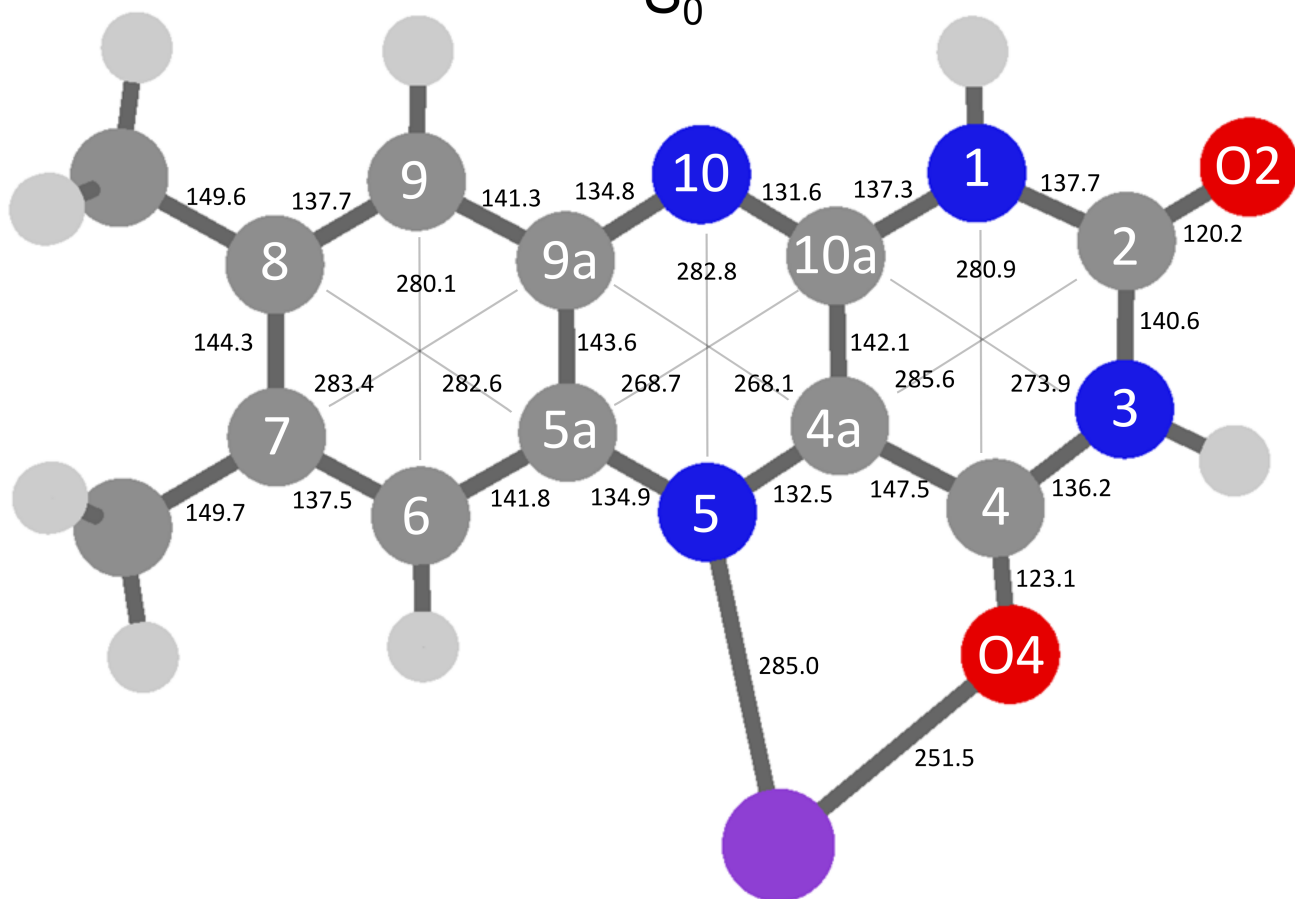

S<sub>1</sub> ← S<sub>0</sub>

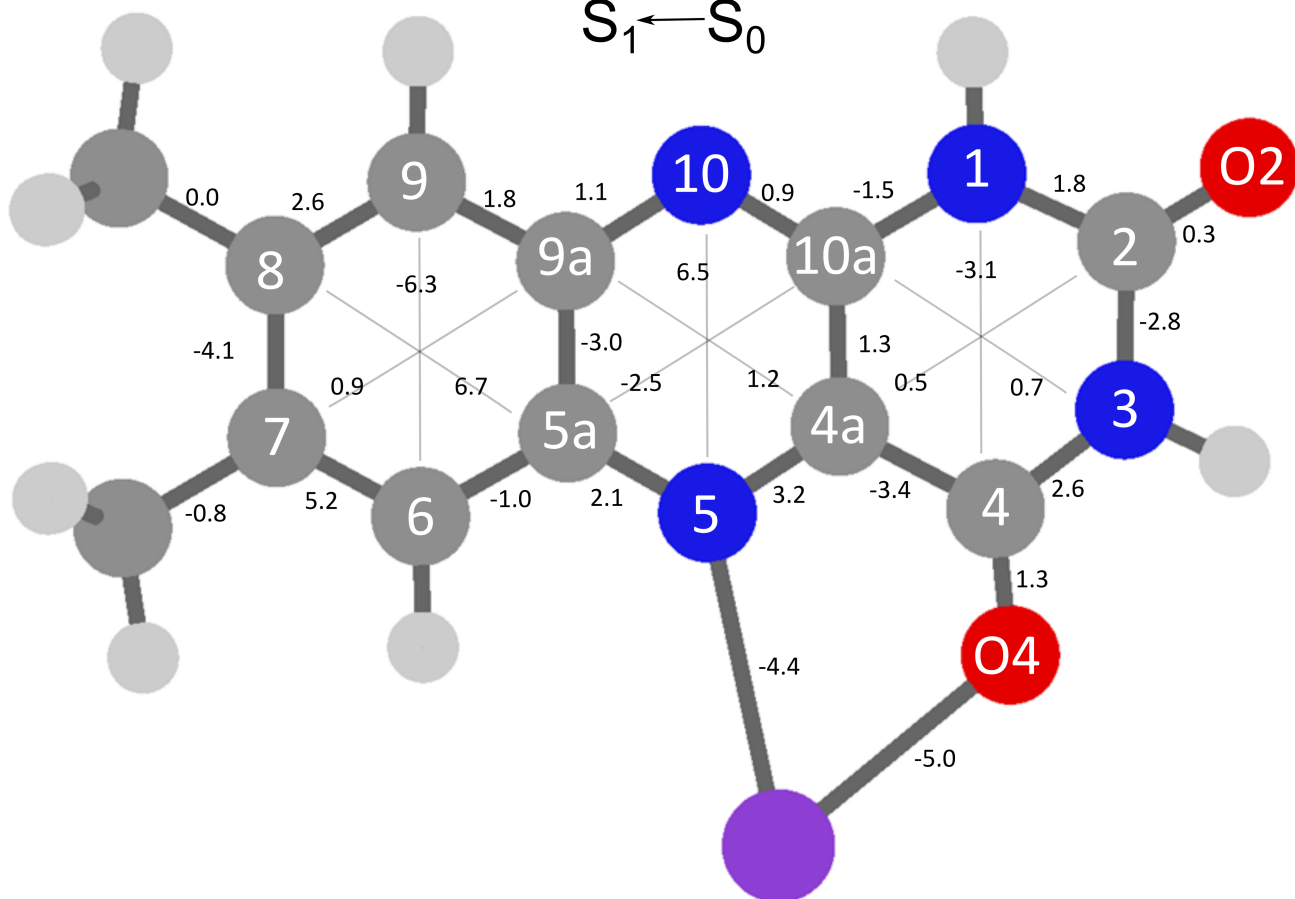

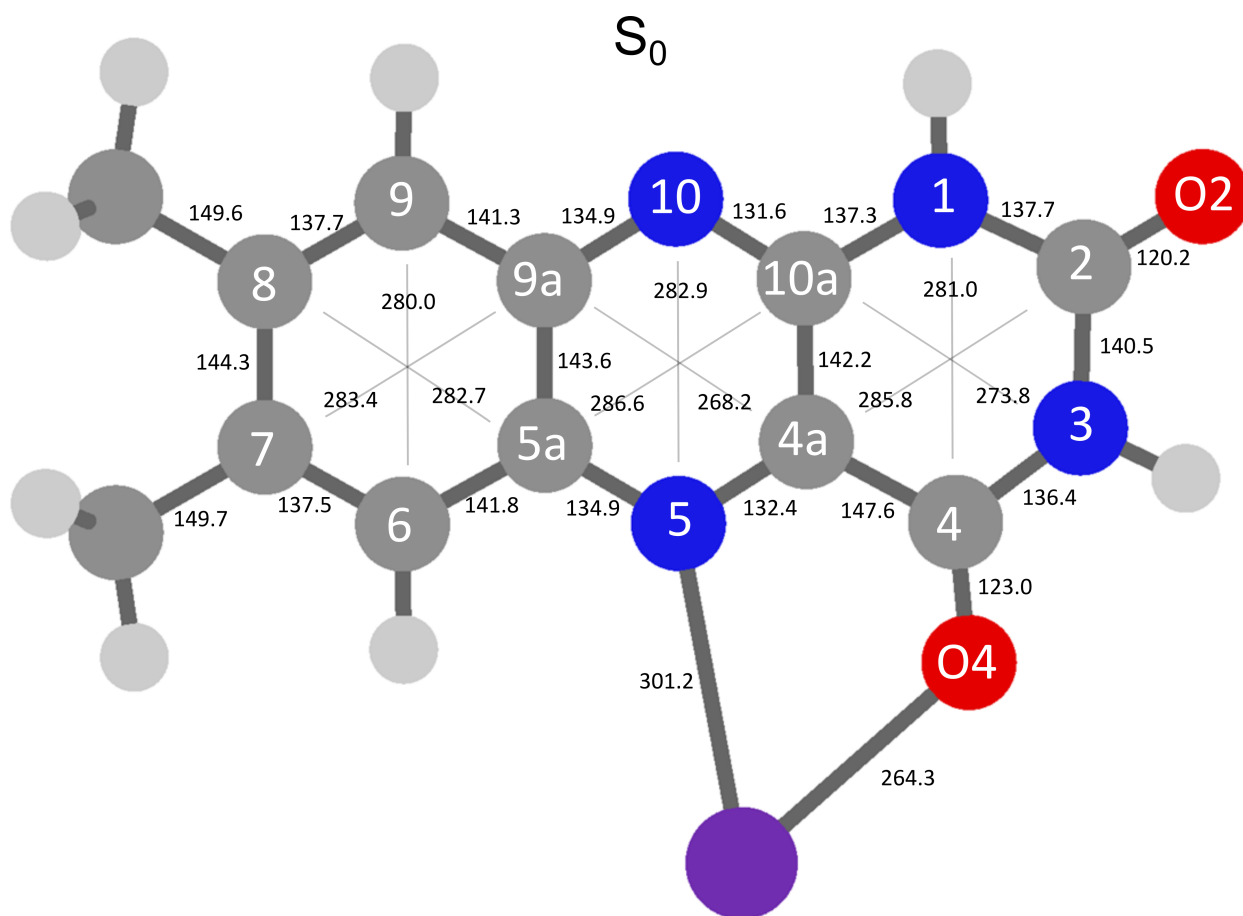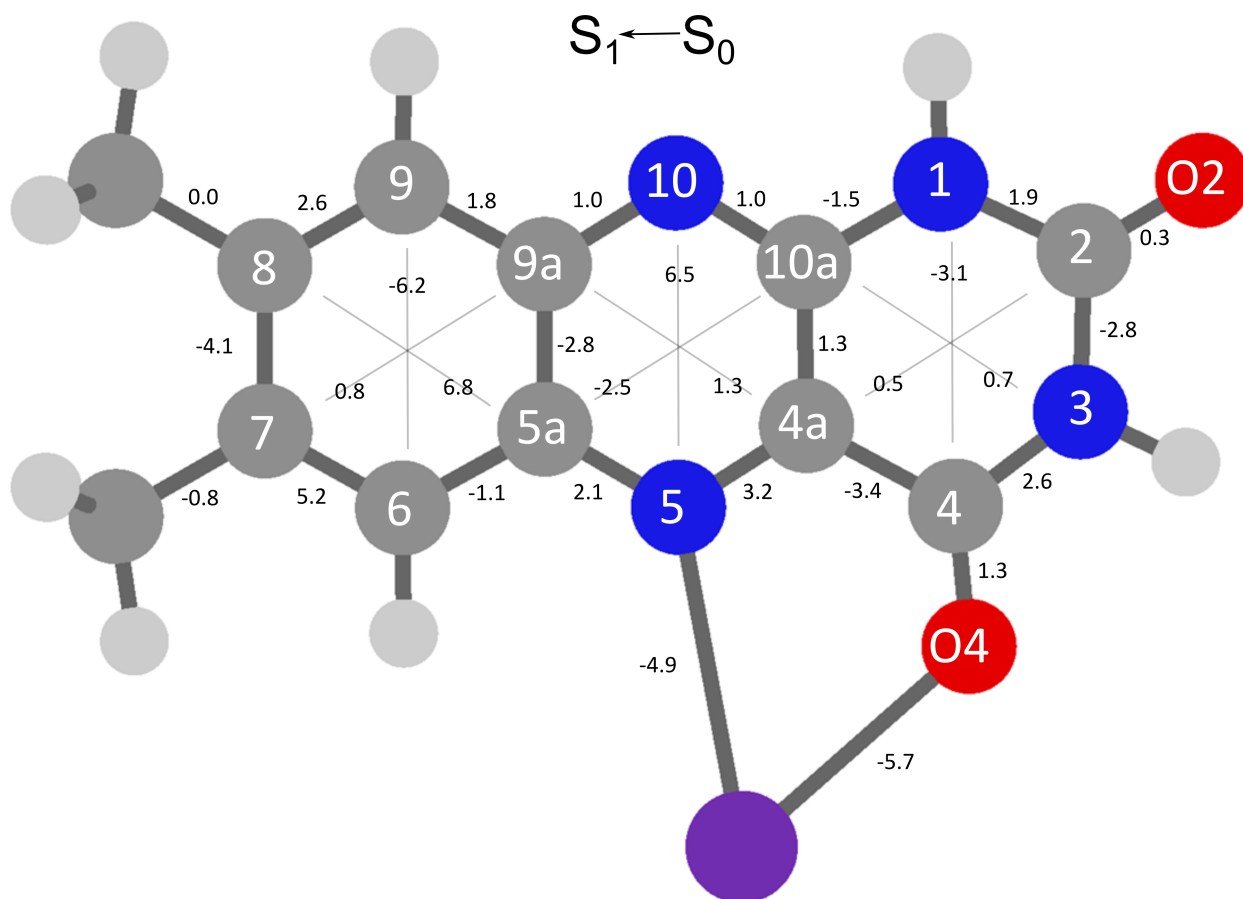

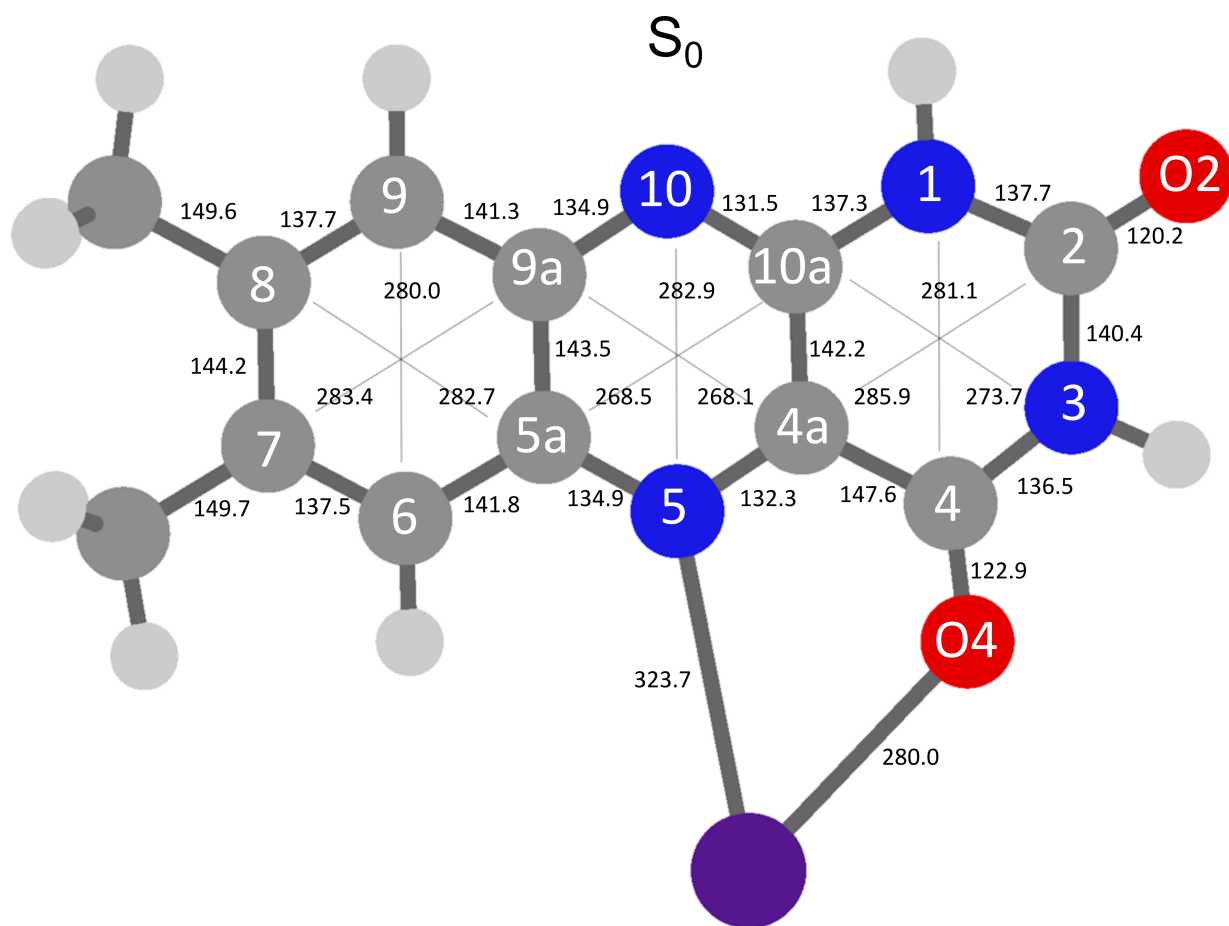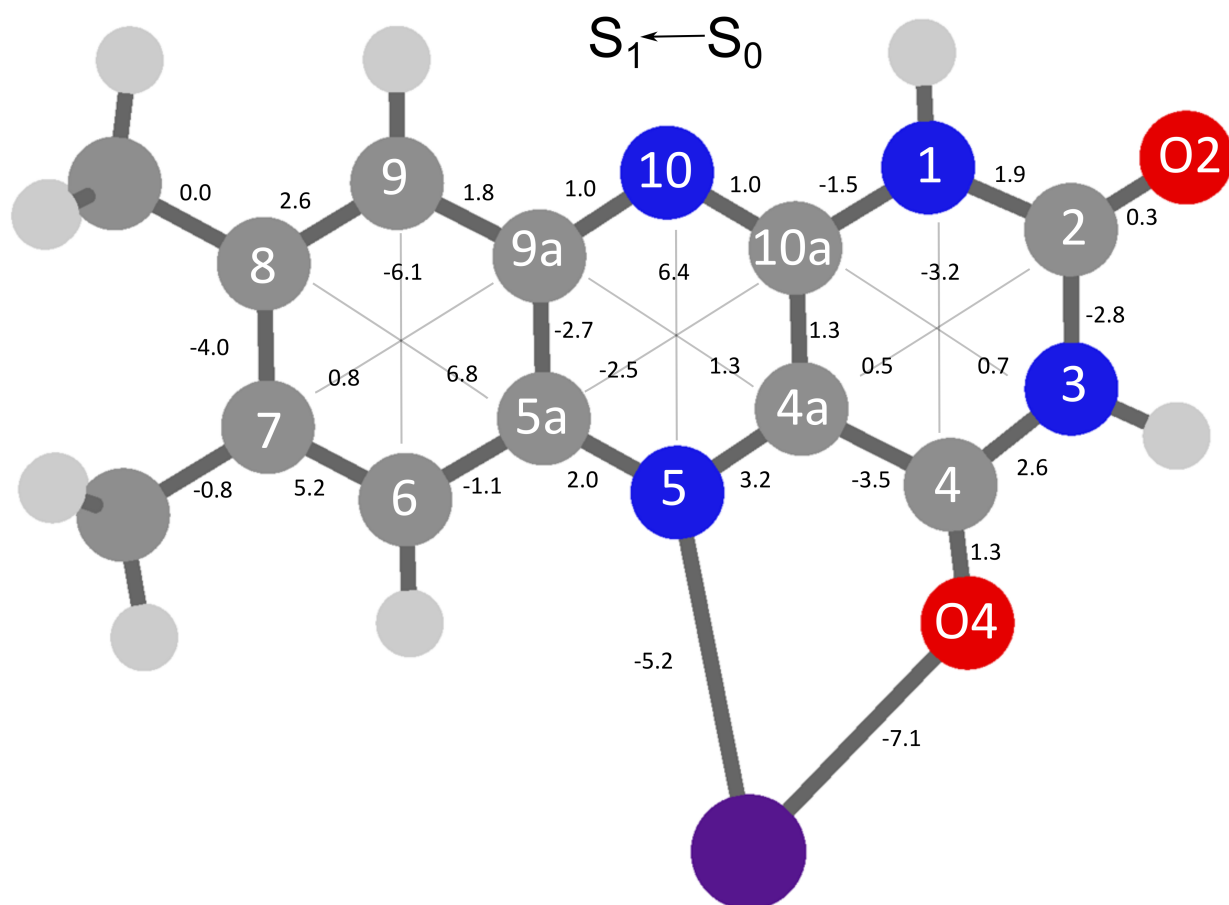

**Table S1.** Experimental frequencies for vibronic transitions (in  $\text{cm}^{-1}$ ) observed in the VISPD spectrum of the  $S_1$  state of  $M^+LC$  compared to harmonic frequencies of the  $M^+LC(O4)$  isomer computed at the PBE0/cc-pVDZ level, along with the mode assignment.

**(a)  $Li^+LC(O4)$**

| Band | $\nu$ (exp) | $\nu$ (calc) | Assignment  |
|------|-------------|--------------|-------------|
|      | 21911       | 20757        | $0^0$       |
| A    | 157         | 161          | m1          |
| B    | 288         | 307          | m3          |
| C    | 299         | 314          | m4          |
| D    | 319         | 322          | 2m1         |
| E    | 350         | 373          | $\beta$     |
| F    | 403         | 418          | m5          |
| G    | 470         | 468          | m1+m3       |
| H    | 454         | 475          | m1+m4       |
| I    | 466         | 483          | 3m1         |
| J    | 507         | 534          | m1+ $\beta$ |
| K    | 548         | 569          | m10         |
| L    | 561         | 579          | m1+ m5      |
| M    | 581         | 607          | m9          |
| N    | 595         | 615          | $\sigma$    |



**(b) Na<sup>+</sup>LC(O4)**

| Band | $\nu$ (exp) | $\nu$ (calc) | Assignment      |
|------|-------------|--------------|-----------------|
|      | 22786       | 21817        | $0^0$           |
| A    | 128         | 132          | $\beta$         |
| B    | 189         | 195          | m1              |
| C    | 232         | 240          | $\sigma$        |
| D    | 254         | 264          | $2\beta$        |
| E    | 301         | 307          | m3              |
| F    | 314         | 327          | $m1+\beta$      |
| G    | 333         | 342          | m4              |
| H    | 360         | 372          | $\sigma+\beta$  |
| I    | 379         | 396          | $3\beta$        |
| J    | 420         | 428          | m5              |
| K    | 429         | 435          | $m1+\sigma$     |
|      |             | 439          | $m3+\beta$      |
| L    | 436         | 445          | m6              |
|      | 443         | 459          | $m1+2\beta$     |
| M    | 460         | 474          | $m4+\beta$      |
| N    | 468         | 480          | $2\sigma$       |
| O    | 489         | 504          | $\sigma+2\beta$ |
| P    | 522         | 537          | $m1+m4$         |
| Q    | 534         | 538          | m8              |
| R    | 547         | 560          | $m5+\beta$      |
| S    | 569         | 582          | m9              |
| T    | 590         | 601          | m10             |

**(c) K<sup>+</sup>LC(O4)**

| Band | v (exp) | v (calc) | assignment      |
|------|---------|----------|-----------------|
|      | 23315   | 22360    | $0^0$           |
| A    | 83      | 86       | $\beta$         |
| B    | 155     | 161      | $\sigma$        |
| C    | 168     | 172      | $2\beta$        |
| D    | 235     | 247      | $\sigma+\beta$  |
| E    | 295     | 303      | m3              |
| F    | 308     | 322      | $2\sigma$       |
| G    | 325     | 328      | m4              |
|      |         | 333      | $\sigma+2\beta$ |
| H    | 377     | 389      | $m3+\beta$      |
| I    | 410     | 408      | $2\sigma+\beta$ |
|      |         | 419      | $\sigma+3\beta$ |
|      |         | 419      | m5              |
| J    | 450     | 464      | $m3+\sigma$     |
| K    | 466     | 476      | m7              |
|      |         | 475      | $m3+2\beta$     |
| L    | 480     | 489      | $m4+\sigma$     |
| M    | 492     | 505      | $m5+\beta$      |
| N    | 565     | 579      | m9              |
|      |         | 580      | $m5+\sigma$     |

(d) Rb<sup>+</sup>LC(O4)

| Band | v (exp)              | v (calc)          | assignment                            |
|------|----------------------|-------------------|---------------------------------------|
|      | 23465                | 22584             | 0 <sup>0</sup>                        |
| A    | 57                   | 60                | $\beta$                               |
| B    | 113                  | 120               | 2 $\beta$                             |
| C    | 125                  | 132               | $\sigma$                              |
| D    | 169<br>Shoulder: 182 | 180<br>180        | 3 $\beta$<br>m1                       |
| E    | 183                  | 192               | $\sigma+\beta$                        |
| F    | 223<br>Shoulder:230  | 240<br>240        | m1+ $\beta$<br>4 $\beta$              |
| G    | 239                  | 252               | $\sigma+2\beta$                       |
| H    | 249                  | 264               | 2 $\sigma$                            |
| I    | 293                  | 301<br>312<br>312 | m3<br>m1+ $\sigma$<br>$\sigma+3\beta$ |
| J    | 323                  | 324<br>325        | 2 $\sigma+\beta$<br>m4                |

(e) Cs<sup>+</sup>LC(O4)

| Band | $\nu$ (exp) | $\nu$ (calc) | assignment      |
|------|-------------|--------------|-----------------|
|      | 23571       | 22717        | $0^u$           |
| A    | 45          | 45           | $\beta$         |
| B    | 90          | 90           | $2\beta$        |
| C    | 108         | 114          | $\sigma$        |
| D    | 133         | 135          | $3\beta$        |
| E    | 152         | 159          | $\sigma+\beta$  |
| F    | 170         | 174          | $m_1$           |
| G    | 196         | 204          | $\sigma+2\beta$ |
| H    | 214         | 228          | $2\sigma$       |
| I    | 240         | 249          | $\sigma+3\beta$ |

**Table S2.** Calculated vibrations (in  $\text{cm}^{-1}$ ) for the  $S_0$  and  $S_1$  states of the  $M^+LC(O4)$  isomers,  $H^+LC(N5)$ , and LC.**(a)  $Li^+LC(O4)$** 

| $S_0$  |         |        |           | $S_1$  |         |        |           |
|--------|---------|--------|-----------|--------|---------|--------|-----------|
| $\nu$  | sym(a') | $\nu$  | sym (a'') | $\nu$  | sym(a') | $\nu$  | sym (a'') |
| 159.4  | 53      | 56.1   | 81        | 161.3  | 53      | 54.2   | 81        |
| 293.7  | 52      | 67.1   | 80        | 280.4  | 52      | 66.2   | 80        |
| 310.2  | 51      | 120.2  | 79        | 306.5  | 51      | 102.0  | 79        |
| 325.3  | 50      | 136.7  | 78        | 313.8  | 50      | 117.9  | 78        |
| 354.3  | 49      | 149.0  | 77        | 372.9  | 49      | 137.7  | 77        |
| 414.1  | 48      | 171.0  | 76        | 417.9  | 48      | 153.7  | 76        |
| 446.0  | 47      | 200.2  | 75        | 445.5  | 47      | 169.4  | 75        |
| 481.0  | 46      | 203.8  | 74        | 480.0  | 46      | 205.1  | 74        |
| 496.5  | 45      | 252.5  | 73        | 504.6  | 45      | 226.6  | 73        |
| 568.1  | 44      | 315.0  | 72        | 568.6  | 44      | 292.0  | 72        |
| 598.4  | 43      | 392.5  | 71        | 607.0  | 43      | 346.9  | 71        |
| 622.7  | 42      | 466.8  | 70        | 615.0  | 42      | 380.6  | 70        |
| 661.8  | 41      | 517.1  | 69        | 659.6  | 41      | 454.4  | 69        |
| 710.9  | 40      | 625.4  | 68        | 711.8  | 40      | 590.7  | 68        |
| 754.1  | 39      | 645.3  | 67        | 763.1  | 39      | 619.2  | 67        |
| 806.6  | 38      | 681.3  | 66        | 810.4  | 38      | 668.7  | 66        |
| 858.7  | 37      | 733.7  | 65        | 856.9  | 37      | 689.8  | 65        |
| 903.7  | 36      | 774.6  | 64        | 905.6  | 36      | 716.2  | 64        |
| 1005.7 | 35      | 791.4  | 63        | 1001.3 | 35      | 767.0  | 63        |
| 1017.9 | 34      | 835.2  | 62        | 1010.6 | 34      | 784.6  | 62        |
| 1026.7 | 33      | 872.6  | 61        | 1021.6 | 33      | 884.0  | 61        |
| 1170.3 | 32      | 914.2  | 60        | 1156.7 | 32      | 903.4  | 60        |
| 1185.7 | 31      | 1031.6 | 59        | 1178.4 | 31      | 1005.2 | 59        |
| 1220.7 | 30      | 1051.7 | 58        | 1222.6 | 30      | 1037.7 | 58        |
| 1257.2 | 29      | 1438.8 | 57        | 1236.8 | 29      | 1429.5 | 57        |
| 1286.0 | 28      | 1454.4 | 56        | 1274.0 | 28      | 1448.1 | 56        |
| 1315.9 | 27      | 3134.9 | 55        | 1296.4 | 27      | 3112.5 | 55        |
| 1340.2 | 26      | 3137.4 | 54        | 1330.6 | 26      | 3129.6 | 54        |
| 1380.2 | 25      |        |           | 1349.8 | 25      |        |           |
| 1387.9 | 24      |        |           | 1353.5 | 24      |        |           |
| 1392.1 | 23      |        |           | 1375.3 | 23      |        |           |
| 1399.4 | 22      |        |           | 1389.2 | 22      |        |           |
| 1427.7 | 21      |        |           | 1392.6 | 21      |        |           |
| 1433.3 | 20      |        |           | 1429.5 | 20      |        |           |
| 1457.1 | 19      |        |           | 1446.0 | 19      |        |           |
| 1467.3 | 18      |        |           | 1460.0 | 18      |        |           |
| 1488.5 | 17      |        |           | 1472.1 | 17      |        |           |
| 1529.0 | 16      |        |           | 1496.8 | 16      |        |           |
| 1547.5 | 15      |        |           | 1510.8 | 15      |        |           |
| 1576.0 | 14      |        |           | 1576.9 | 14      |        |           |
| 1641.4 | 13      |        |           | 1595.3 | 13      |        |           |
| 1643.6 | 12      |        |           | 1625.1 | 12      |        |           |
| 1709.3 | 11      |        |           | 1691.6 | 11      |        |           |
| 1758.9 | 10      |        |           | 1710.6 | 10      |        |           |
| 1906.5 | 9       |        |           | 1878.0 | 9       |        |           |
| 3062.4 | 8       |        |           | 3047.2 | 8       |        |           |
| 3063.5 | 7       |        |           | 3057.9 | 7       |        |           |
| 3175.8 | 6       |        |           | 3179.8 | 6       |        |           |
| 3182.5 | 5       |        |           | 3181.2 | 5       |        |           |
| 3202.1 | 4       |        |           | 3208.0 | 4       |        |           |
| 3233.8 | 3       |        |           | 3224.5 | 3       |        |           |
| 3592.5 | 2       |        |           | 3602.7 | 2       |        |           |
| 3613.6 | 1       |        |           | 3619.2 | 1       |        |           |

(b) Na<sup>+</sup>LC(O4)

| S <sub>0</sub> |         |        |           | S <sub>1</sub> |         |        |           |
|----------------|---------|--------|-----------|----------------|---------|--------|-----------|
| v              | sym(a') | v      | sym (a'') | v              | sym(a') | v      | sym (a'') |
| 123.2          | 53      | 50.1   | 81        | 132.1          | 53      | 48.1   | 81        |
| 186.8          | 52      | 64.8   | 80        | 194.8          | 52      | 63.6   | 80        |
| 232.8          | 51      | 78.9   | 79        | 239.5          | 51      | 73.4   | 79        |
| 303.1          | 50      | 126.8  | 78        | 288.7          | 50      | 102.1  | 78        |
| 314.2          | 49      | 138.7  | 77        | 306.5          | 49      | 126.4  | 77        |
| 343.9          | 48      | 166.6  | 76        | 341.8          | 48      | 146.0  | 76        |
| 428.1          | 47      | 176.6  | 75        | 427.8          | 47      | 162.0  | 75        |
| 444.8          | 46      | 200.5  | 74        | 445.4          | 46      | 175.4  | 74        |
| 478.9          | 45      | 253.9  | 73        | 476.9          | 45      | 223.4  | 73        |
| 541.3          | 44      | 316.0  | 72        | 538.2          | 44      | 290.8  | 72        |
| 585.7          | 43      | 391.9  | 71        | 582.1          | 43      | 343.1  | 71        |
| 615.7          | 42      | 466.0  | 70        | 601.0          | 42      | 380.8  | 70        |
| 656.6          | 41      | 512.6  | 69        | 653.7          | 41      | 448.0  | 69        |
| 703.4          | 40      | 625.0  | 68        | 699.7          | 40      | 592.9  | 68        |
| 754.8          | 39      | 646.3  | 67        | 759.0          | 39      | 617.9  | 67        |
| 804.6          | 38      | 681.3  | 66        | 780.6          | 38      | 671.0  | 66        |
| 854.6          | 37      | 733.0  | 65        | 848.7          | 37      | 691.5  | 65        |
| 901.4          | 36      | 773.7  | 64        | 903.5          | 36      | 715.8  | 64        |
| 1007.0         | 35      | 790.9  | 63        | 1001.9         | 35      | 767.5  | 63        |
| 1022.8         | 34      | 835.3  | 62        | 1010.3         | 34      | 806.7  | 62        |
| 1027.0         | 33      | 867.9  | 61        | 1027.0         | 33      | 880.9  | 61        |
| 1168.4         | 32      | 914.8  | 60        | 1156.1         | 32      | 902.5  | 60        |
| 1177.7         | 31      | 1031.8 | 59        | 1169.7         | 31      | 1004.7 | 59        |
| 1217.6         | 30      | 1052.6 | 58        | 1219.4         | 30      | 1038.4 | 58        |
| 1254.9         | 29      | 1439.5 | 57        | 1235.9         | 29      | 1430.1 | 57        |
| 1288.8         | 28      | 1455.2 | 56        | 1266.2         | 28      | 1449.5 | 56        |
| 1313.9         | 27      | 3134.3 | 55        | 1291.4         | 27      | 3111.8 | 55        |
| 1337.1         | 26      | 3136.8 | 54        | 1325.2         | 26      | 3129.2 | 54        |
| 1375.4         | 25      |        |           | 1352.4         | 25      |        |           |
| 1388.3         | 24      |        |           | 1357.7         | 24      |        |           |
| 1394.9         | 23      |        |           | 1375.4         | 23      |        |           |
| 1403.0         | 22      |        |           | 1391.1         | 22      |        |           |
| 1427.5         | 21      |        |           | 1395.7         | 21      |        |           |
| 1434.4         | 20      |        |           | 1426.4         | 20      |        |           |
| 1456.7         | 19      |        |           | 1446.0         | 19      |        |           |
| 1465.8         | 18      |        |           | 1456.1         | 18      |        |           |
| 1479.9         | 17      |        |           | 1467.5         | 17      |        |           |
| 1527.6         | 16      |        |           | 1493.7         | 16      |        |           |
| 1544.8         | 15      |        |           | 1500.1         | 15      |        |           |
| 1572.5         | 14      |        |           | 1574.0         | 14      |        |           |
| 1638.6         | 13      |        |           | 1582.7         | 13      |        |           |
| 1646.4         | 12      |        |           | 1614.4         | 12      |        |           |
| 1710.5         | 11      |        |           | 1679.4         | 11      |        |           |
| 1773.6         | 10      |        |           | 1720.5         | 10      |        |           |
| 1902.8         | 9       |        |           | 1871.3         | 9       |        |           |
| 3062.0         | 8       |        |           | 3046.8         | 8       |        |           |
| 3062.8         | 7       |        |           | 3057.7         | 7       |        |           |
| 3172.6         | 6       |        |           | 3177.4         | 6       |        |           |
| 3181.2         | 5       |        |           | 3179.6         | 5       |        |           |
| 3193.5         | 4       |        |           | 3202.2         | 4       |        |           |
| 3232.3         | 3       |        |           | 3223.2         | 3       |        |           |
| 3600.0         | 2       |        |           | 3602.7         | 2       |        |           |
| 3617.2         | 1       |        |           | 3625.3         | 1       |        |           |

(c) K<sup>+</sup>LC(O4)

| S <sub>0</sub> |         |        |           | S <sub>1</sub> |         |        |           |
|----------------|---------|--------|-----------|----------------|---------|--------|-----------|
| v              | sym(a') | v      | sym (a'') | v              | sym(a') | v      | sym (a'') |
| 78.9           | 53      | 38.9   | 81        | 86.0           | 53      | 37.0   | 81        |
| 156.1          | 52      | 60.0   | 80        | 160.7          | 52      | 59.5   | 80        |
| 189.5          | 51      | 67.4   | 79        | 198.7          | 51      | 62.5   | 79        |
| 298.6          | 50      | 125.0  | 78        | 285.0          | 50      | 101.9  | 78        |
| 309.4          | 49      | 138.4  | 77        | 302.5          | 49      | 124.7  | 77        |
| 336.0          | 48      | 161.1  | 76        | 328.4          | 48      | 144.8  | 76        |
| 418.8          | 47      | 172.6  | 75        | 418.6          | 47      | 155.7  | 75        |
| 440.3          | 46      | 199.1  | 74        | 436.6          | 46      | 170.6  | 74        |
| 478.0          | 45      | 253.4  | 73        | 475.7          | 45      | 221.8  | 73        |
| 539.0          | 44      | 315.8  | 72        | 535.0          | 44      | 287.4  | 72        |
| 584.7          | 43      | 391.1  | 71        | 578.5          | 43      | 337.6  | 71        |
| 613.0          | 42      | 464.9  | 70        | 598.3          | 42      | 380.1  | 70        |
| 654.6          | 41      | 509.0  | 69        | 651.1          | 41      | 441.5  | 69        |
| 701.3          | 40      | 624.1  | 68        | 696.9          | 40      | 593.4  | 68        |
| 754.7          | 39      | 646.1  | 67        | 756.3          | 39      | 615.2  | 67        |
| 804.2          | 38      | 680.9  | 66        | 805.6          | 38      | 668.4  | 66        |
| 852.2          | 37      | 731.4  | 65        | 844.3          | 37      | 691.0  | 65        |
| 900.0          | 36      | 772.7  | 64        | 902.1          | 36      | 713.5  | 64        |
| 1006.8         | 35      | 790.4  | 63        | 1001.6         | 35      | 767.1  | 63        |
| 1024.1         | 34      | 835.5  | 62        | 1009.9         | 34      | 779.3  | 62        |
| 1027.3         | 33      | 867.4  | 61        | 1028.3         | 33      | 878.6  | 61        |
| 1167.0         | 32      | 914.3  | 60        | 1155.4         | 32      | 900.8  | 60        |
| 1174.2         | 31      | 1031.9 | 59        | 1165.0         | 31      | 1004.4 | 59        |
| 1215.2         | 30      | 1052.9 | 58        | 1216.1         | 30      | 1038.8 | 58        |
| 1253.0         | 29      | 1439.8 | 57        | 1235.5         | 29      | 1430.5 | 57        |
| 1288.7         | 28      | 1455.4 | 56        | 1261.6         | 28      | 1450.2 | 56        |
| 1312.5         | 27      | 3133.5 | 55        | 1288.7         | 27      | 3111.1 | 55        |
| 1335.0         | 26      | 3135.8 | 54        | 1321.6         | 26      | 3128.7 | 54        |
| 1372.2         | 25      |        |           | 1352.0         | 25      |        |           |
| 1388.3         | 24      |        |           | 1361.6         | 24      |        |           |
| 1395.3         | 23      |        |           | 1375.4         | 23      |        |           |
| 1404.0         | 22      |        |           | 1391.2         | 22      |        |           |
| 1427.1         | 21      |        |           | 1395.8         | 21      |        |           |
| 1434.3         | 20      |        |           | 1424.7         | 20      |        |           |
| 1455.9         | 19      |        |           | 1446.1         | 19      |        |           |
| 1464.2         | 18      |        |           | 1453.8         | 18      |        |           |
| 1478.4         | 17      |        |           | 1466.1         | 17      |        |           |
| 1526.7         | 16      |        |           | 1490.6         | 16      |        |           |
| 1543.0         | 15      |        |           | 1500.5         | 15      |        |           |
| 1570.7         | 14      |        |           | 1571.8         | 14      |        |           |
| 1636.8         | 13      |        |           | 1575.5         | 13      |        |           |
| 1648.4         | 12      |        |           | 1610.6         | 12      |        |           |
| 1711.2         | 11      |        |           | 1671.8         | 11      |        |           |
| 1771.5         | 10      |        |           | 1717.5         | 10      |        |           |
| 1900.2         | 9       |        |           | 1867.9         | 9       |        |           |
| 3061.4         | 8       |        |           | 3046.3         | 8       |        |           |
| 3061.9         | 7       |        |           | 3057.3         | 7       |        |           |
| 3170.2         | 6       |        |           | 3175.8         | 6       |        |           |
| 3180.0         | 5       |        |           | 3178.3         | 5       |        |           |
| 3193.7         | 4       |        |           | 3202.2         | 4       |        |           |
| 3230.6         | 3       |        |           | 3222.1         | 3       |        |           |
| 3603.1         | 2       |        |           | 3603.0         | 2       |        |           |
| 3619.0         | 1       |        |           | 3628.2         | 1       |        |           |

(d) Rb<sup>+</sup>LC(O4)

| S <sub>0</sub> |         |        |          | S <sub>1</sub> |         |        |          |
|----------------|---------|--------|----------|----------------|---------|--------|----------|
| v              | sym(a') | v      | sym(a'') | v              | sym(a') | v      | sym(a'') |
| 54.9           | 53      | 33.1   | 81       | 59.8           | 53      | 31.5   | 81       |
| 122.4          | 52      | 58.1   | 80       | 131.5          | 52      | 57.6   | 80       |
| 175.9          | 51      | 66.8   | 79       | 179.6          | 51      | 62.4   | 79       |
| 296.8          | 50      | 124.8  | 78       | 283.4          | 50      | 100.3  | 78       |
| 308.3          | 49      | 138.3  | 77       | 301.4          | 49      | 124.8  | 77       |
| 334.0          | 48      | 158.8  | 76       | 324.6          | 48      | 144.6  | 76       |
| 416.4          | 47      | 172.0  | 75       | 415.8          | 47      | 153.8  | 75       |
| 439.8          | 46      | 199.1  | 74       | 435.1          | 46      | 170.1  | 74       |
| 477.8          | 45      | 253.6  | 73       | 475.3          | 45      | 221.0  | 73       |
| 538.2          | 44      | 316.0  | 72       | 533.9          | 44      | 286.1  | 72       |
| 584.4          | 43      | 391.1  | 71       | 577.2          | 43      | 336.5  | 71       |
| 612.4          | 42      | 464.6  | 70       | 597.7          | 42      | 379.8  | 70       |
| 654.3          | 41      | 508.7  | 69       | 650.8          | 41      | 440.6  | 69       |
| 700.7          | 40      | 623.8  | 68       | 696.0          | 40      | 593.5  | 68       |
| 754.9          | 39      | 646.1  | 67       | 755.4          | 39      | 614.3  | 67       |
| 804.0          | 38      | 680.5  | 66       | 805.2          | 38      | 668.3  | 66       |
| 851.9          | 37      | 730.8  | 65       | 843.5          | 37      | 691.1  | 65       |
| 899.8          | 36      | 772.3  | 64       | 901.7          | 36      | 712.9  | 64       |
| 1006.9         | 35      | 790.6  | 63       | 1001.5         | 35      | 767.1  | 63       |
| 1024.4         | 34      | 835.5  | 62       | 1009.8         | 34      | 778.3  | 62       |
| 1027.8         | 33      | 868.2  | 61       | 1028.7         | 33      | 878.2  | 61       |
| 1166.6         | 32      | 914.4  | 60       | 1155.1         | 32      | 900.3  | 60       |
| 1173.2         | 31      | 1032.1 | 59       | 1164.1         | 31      | 1004.1 | 59       |
| 1214.3         | 30      | 1053.1 | 58       | 1215.4         | 30      | 1038.9 | 58       |
| 1252.3         | 29      | 1440.0 | 57       | 1235.5         | 29      | 1430.4 | 57       |
| 1289.2         | 28      | 1455.7 | 56       | 1260.7         | 28      | 1450.7 | 56       |
| 1312.2         | 27      | 3133.3 | 55       | 1288.3         | 27      | 3110.8 | 55       |
| 1334.7         | 26      | 3135.5 | 54       | 1321.0         | 26      | 3128.5 | 54       |
| 1371.4         | 25      |        |          | 1352.3         | 25      |        |          |
| 1388.4         | 24      |        |          | 1363.4         | 24      |        |          |
| 1395.6         | 23      |        |          | 1375.0         | 23      |        |          |
| 1404.7         | 22      |        |          | 1391.4         | 22      |        |          |
| 1427.4         | 21      |        |          | 1396.1         | 21      |        |          |
| 1434.4         | 20      |        |          | 1424.0         | 20      |        |          |
| 1455.7         | 19      |        |          | 1446.0         | 19      |        |          |
| 1463.6         | 18      |        |          | 1453.2         | 18      |        |          |
| 1478.3         | 17      |        |          | 1465.7         | 17      |        |          |
| 1526.6         | 16      |        |          | 1489.9         | 16      |        |          |
| 1543.3         | 15      |        |          | 1500.8         | 15      |        |          |
| 1570.3         | 14      |        |          | 1571.2         | 14      |        |          |
| 1636.9         | 13      |        |          | 1573.2         | 13      |        |          |
| 1649.5         | 12      |        |          | 1608.9         | 12      |        |          |
| 1711.7         | 11      |        |          | 1670.0         | 11      |        |          |
| 1776.5         | 10      |        |          | 1721.0         | 10      |        |          |
| 1899.2         | 9       |        |          | 1866.8         | 9       |        |          |
| 3061.3         | 8       |        |          | 3046.0         | 8       |        |          |
| 3061.6         | 7       |        |          | 3057.3         | 7       |        |          |
| 3169.4         | 6       |        |          | 3175.2         | 6       |        |          |
| 3179.7         | 5       |        |          | 3178.0         | 5       |        |          |
| 3195.6         | 4       |        |          | 3203.2         | 4       |        |          |
| 3230.2         | 3       |        |          | 3221.6         | 3       |        |          |
| 3605.5         | 2       |        |          | 3603.4         | 2       |        |          |
| 3619.9         | 1       |        |          | 3629.8         | 1       |        |          |



(e) Cs<sup>+</sup>LC(O4)

| S <sub>0</sub> |         |        |           | S <sub>1</sub> |         |        |           |
|----------------|---------|--------|-----------|----------------|---------|--------|-----------|
| v              | sym(a') | v      | sym (a'') | v              | sym(a') | v      | sym (a'') |
| 42.0           | 53      | 29.4   | 81        | 45.2           | 53      | 28.8   | 81        |
| 103.7          | 52      | 57.5   | 80        | 113.5          | 52      | 56.9   | 80        |
| 171.4          | 51      | 66.6   | 79        | 173.5          | 51      | 62.0   | 79        |
| 295.6          | 50      | 124.7  | 78        | 282.7          | 50      | 101.6  | 78        |
| 307.6          | 49      | 138.6  | 77        | 300.7          | 49      | 124.3  | 77        |
| 332.9          | 48      | 157.9  | 76        | 322.4          | 48      | 144.8  | 76        |
| 414.3          | 47      | 171.7  | 75        | 413.2          | 47      | 153.1  | 75        |
| 439.3          | 46      | 199.2  | 74        | 434.3          | 46      | 169.5  | 74        |
| 477.7          | 45      | 253.7  | 73        | 475.2          | 45      | 221.0  | 73        |
| 537.5          | 44      | 316.0  | 72        | 532.9          | 44      | 285.0  | 72        |
| 584.1          | 43      | 391.2  | 71        | 576.1          | 43      | 335.5  | 71        |
| 611.8          | 42      | 464.5  | 70        | 597.2          | 42      | 380.2  | 70        |
| 653.8          | 41      | 508.1  | 69        | 650.3          | 41      | 440.3  | 69        |
| 700.1          | 40      | 623.6  | 68        | 695.4          | 40      | 593.5  | 68        |
| 754.9          | 39      | 646.1  | 67        | 754.7          | 39      | 613.2  | 67        |
| 804.0          | 38      | 680.7  | 66        | 805.3          | 38      | 667.4  | 66        |
| 851.2          | 37      | 730.8  | 65        | 842.5          | 37      | 690.8  | 65        |
| 899.5          | 36      | 772.2  | 64        | 901.9          | 36      | 712.5  | 64        |
| 1006.9         | 35      | 791.2  | 63        | 1001.4         | 35      | 767.0  | 63        |
| 1024.3         | 34      | 836.2  | 62        | 1009.6         | 34      | 778.8  | 62        |
| 1028.0         | 33      | 869.1  | 61        | 1028.8         | 33      | 878.8  | 61        |
| 1166.3         | 32      | 914.4  | 60        | 1155.1         | 32      | 899.9  | 60        |
| 1172.2         | 31      | 1032.1 | 59        | 1163.0         | 31      | 1004.1 | 59        |
| 1213.4         | 30      | 1053.3 | 58        | 1214.1         | 30      | 1039.1 | 58        |
| 1251.5         | 29      | 1440.2 | 57        | 1235.5         | 29      | 1430.7 | 57        |
| 1289.3         | 28      | 1455.9 | 56        | 1260.1         | 28      | 1450.9 | 56        |
| 1311.8         | 27      | 3133.1 | 55        | 1287.8         | 27      | 3110.5 | 55        |
| 1334.0         | 26      | 3135.1 | 54        | 1320.4         | 26      | 3128.4 | 54        |
| 1370.5         | 25      |        |           | 1352.2         | 25      |        |           |
| 1388.4         | 24      |        |           | 1364.5         | 24      |        |           |
| 1395.6         | 23      |        |           | 1374.9         | 23      |        |           |
| 1404.7         | 22      |        |           | 1391.1         | 22      |        |           |
| 1427.3         | 21      |        |           | 1395.9         | 21      |        |           |
| 1434.3         | 20      |        |           | 1423.8         | 20      |        |           |
| 1455.6         | 19      |        |           | 1446.3         | 19      |        |           |
| 1463.3         | 18      |        |           | 1452.9         | 18      |        |           |
| 1478.0         | 17      |        |           | 1465.7         | 17      |        |           |
| 1526.3         | 16      |        |           | 1489.5         | 16      |        |           |
| 1543.1         | 15      |        |           | 1501.1         | 15      |        |           |
| 1569.9         | 14      |        |           | 1570.2         | 14      |        |           |
| 1636.4         | 13      |        |           | 1571.9         | 13      |        |           |
| 1650.0         | 12      |        |           | 1608.5         | 12      |        |           |
| 1711.9         | 11      |        |           | 1668.2         | 11      |        |           |
| 1774.7         | 10      |        |           | 1718.0         | 10      |        |           |
| 1898.4         | 9       |        |           | 1866.3         | 9       |        |           |
| 3061.0         | 8       |        |           | 3045.9         | 8       |        |           |
| 3061.3         | 7       |        |           | 3057.2         | 7       |        |           |
| 3168.7         | 6       |        |           | 3175.1         | 6       |        |           |
| 3179.3         | 5       |        |           | 3177.6         | 5       |        |           |
| 3197.8         | 4       |        |           | 3204.8         | 4       |        |           |
| 3229.8         | 3       |        |           | 3221.6         | 3       |        |           |
| 3607.1         | 2       |        |           | 3603.6         | 2       |        |           |
| 3620.3         | 1       |        |           | 3631.2         | 1       |        |           |

(f) LC

| S <sub>0</sub> |         |        |          | S <sub>1</sub> |         |        |          |
|----------------|---------|--------|----------|----------------|---------|--------|----------|
| v              | sym(a') | v      | sym(a'') | v              | sym(a') | v      | sym(a'') |
| 158.7          | 51      | 53.3   | 78       | 158.5          | 51      | 52.6   | 78       |
| 289.1          | 50      | 65.4   | 77       | 278.1          | 50      | 58.7   | 77       |
| 302.7          | 49      | 120.9  | 76       | 295.7          | 49      | 89.6   | 76       |
| 327.9          | 48      | 136.9  | 75       | 314.3          | 48      | 114.9  | 75       |
| 406.4          | 47      | 142.3  | 74       | 404.0          | 47      | 130.9  | 74       |
| 436.2          | 46      | 170.5  | 73       | 430.1          | 46      | 135.9  | 73       |
| 474.8          | 45      | 196.9  | 72       | 471.2          | 45      | 159.3  | 72       |
| 528.6          | 44      | 252.9  | 71       | 522.0          | 44      | 202.0  | 71       |
| 580.7          | 43      | 319.1  | 70       | 563.7          | 43      | 212.4  | 70       |
| 607.3          | 42      | 392.9  | 69       | 592.3          | 42      | 308.3  | 69       |
| 653.1          | 41      | 462.2  | 68       | 646.9          | 41      | 383.6  | 68       |
| 691.9          | 40      | 507.7  | 67       | 683.3          | 40      | 437.1  | 67       |
| 758.0          | 39      | 605.9  | 66       | 741.6          | 39      | 592.1  | 66       |
| 803.8          | 38      | 642.2  | 65       | 799.8          | 38      | 614.4  | 65       |
| 848.2          | 37      | 675.2  | 64       | 837.3          | 37      | 672.6  | 64       |
| 899.0          | 36      | 722.6  | 63       | 896.5          | 36      | 677.7  | 63       |
| 1006.0         | 35      | 770.0  | 62       | 998.3          | 35      | 719.9  | 62       |
| 1021.7         | 34      | 798.8  | 61       | 1006.3         | 34      | 768.1  | 61       |
| 1035.1         | 33      | 843.9  | 60       | 1027.2         | 33      | 775.8  | 60       |
| 1150.0         | 32      | 902.3  | 59       | 1131.5         | 32      | 872.4  | 59       |
| 1163.5         | 31      | 920.2  | 58       | 1156.4         | 31      | 904.0  | 58       |
| 1208.0         | 30      | 1035.5 | 57       | 1204.5         | 30      | 1003.8 | 57       |
| 1244.1         | 29      | 1056.6 | 56       | 1234.3         | 29      | 1039.2 | 56       |
| 1294.2         | 28      | 1443.3 | 55       | 1242.6         | 28      | 1433.7 | 55       |
| 1307.4         | 27      | 1458.9 | 54       | 1286.3         | 27      | 1453.6 | 54       |
| 1320.6         | 26      | 3122.4 | 53       | 1309.0         | 26      | 3101.5 | 53       |
| 1356.5         | 25      | 3124.5 | 52       | 1352.1         | 25      | 3114.6 | 52       |
| 1387.1         | 24      |        |          | 1371.4         | 24      |        |          |
| 1396.1         | 23      |        |          | 1381.0         | 23      |        |          |
| 1406.7         | 22      |        |          | 1390.2         | 22      |        |          |
| 1427.0         | 21      |        |          | 1397.9         | 21      |        |          |
| 1434.1         | 20      |        |          | 1418.1         | 20      |        |          |
| 1450.2         | 19      |        |          | 1431.4         | 19      |        |          |
| 1461.8         | 18      |        |          | 1451.7         | 18      |        |          |
| 1480.6         | 17      |        |          | 1461.4         | 17      |        |          |
| 1522.4         | 16      |        |          | 1478.3         | 16      |        |          |
| 1545.5         | 15      |        |          | 1499.5         | 15      |        |          |
| 1561.6         | 14      |        |          | 1538.1         | 14      |        |          |
| 1638.9         | 13      |        |          | 1566.4         | 13      |        |          |
| 1661.8         | 12      |        |          | 1573.0         | 12      |        |          |
| 1715.3         | 11      |        |          | 1655.7         | 11      |        |          |
| 1854.0         | 10      |        |          | 1800.0         | 10      |        |          |
| 1871.3         | 9       |        |          | 1844.1         | 9       |        |          |
| 3053.2         | 8       |        |          | 3039.6         | 8       |        |          |
| 3054.4         | 7       |        |          | 3047.5         | 7       |        |          |
| 3165.6         | 6       |        |          | 3163.6         | 6       |        |          |
| 3167.3         | 5       |        |          | 3172.9         | 5       |        |          |
| 3218.2         | 4       |        |          | 3210.6         | 4       |        |          |
| 3220.7         | 3       |        |          | 3216.4         | 3       |        |          |
| 3629.4         | 2       |        |          | 3618.4         | 2       |        |          |
| 3642.1         | 1       |        |          | 3643.5         | 1       |        |          |

(g) H<sup>+</sup>LC (N5)

| S <sub>0</sub> |         |        |          | S <sub>1</sub> |         |        |          |
|----------------|---------|--------|----------|----------------|---------|--------|----------|
| v              | sym(a') | v      | sym(a'') | v              | sym(a') | v      | sym(a'') |
| 152.8          | 53      | 56.8   | 81       | 153.1          | 53      | 53.4   | 81       |
| 282.6          | 52      | 68.3   | 80       | 273.9          | 52      | 67.3   | 80       |
| 304.5          | 51      | 121.5  | 79       | 289.0          | 51      | 104.7  | 79       |
| 329.7          | 50      | 134.8  | 78       | 314.7          | 50      | 121.7  | 78       |
| 412.9          | 49      | 158.1  | 77       | 411.7          | 49      | 142.2  | 77       |
| 431.6          | 48      | 169.0  | 76       | 430.8          | 48      | 155.1  | 76       |
| 473.6          | 47      | 200.1  | 75       | 471.5          | 47      | 172.7  | 75       |
| 525.3          | 46      | 246.5  | 74       | 519.9          | 46      | 220.1  | 74       |
| 572.8          | 45      | 314.2  | 73       | 569.8          | 45      | 287.3  | 73       |
| 609.5          | 44      | 391.1  | 72       | 598.6          | 44      | 329.6  | 72       |
| 651.4          | 43      | 439.7  | 71       | 649.2          | 43      | 369.2  | 71       |
| 694.8          | 42      | 489.6  | 70       | 690.9          | 42      | 424.1  | 70       |
| 749.0          | 41      | 612.9  | 69       | 759.5          | 41      | 585.6  | 69       |
| 798.0          | 40      | 635.4  | 68       | 800.5          | 40      | 617.2  | 68       |
| 847.4          | 39      | 664.5  | 67       | 850.4          | 39      | 632.9  | 67       |
| 898.7          | 38      | 720.0  | 66       | 895.4          | 38      | 672.6  | 66       |
| 1003.8         | 37      | 768.0  | 65       | 999.7          | 37      | 687.4  | 65       |
| 1013.7         | 36      | 773.4  | 64       | 1010.0         | 36      | 719.5  | 64       |
| 1025.0         | 35      | 815.6  | 63       | 1013.2         | 35      | 762.8  | 63       |
| 1151.5         | 34      | 861.4  | 62       | 1142.9         | 34      | 767.3  | 62       |
| 1175.9         | 33      | 910.2  | 61       | 1165.9         | 33      | 877.5  | 61       |
| 1210.7         | 32      | 929.0  | 60       | 1212.7         | 32      | 903.9  | 60       |
| 1257.2         | 31      | 1029.6 | 59       | 1227.2         | 31      | 1006.1 | 59       |
| 1265.8         | 30      | 1049.0 | 58       | 1269.1         | 30      | 1035.4 | 58       |
| 1310.2         | 29      | 1436.3 | 57       | 1287.5         | 29      | 1429.6 | 57       |
| 1341.1         | 28      | 1452.1 | 56       | 1301.1         | 28      | 1444.1 | 56       |
| 1375.4         | 27      | 3137.6 | 55       | 1342.7         | 27      | 3116.6 | 55       |
| 1385.3         | 26      | 3137.8 | 54       | 1353.6         | 26      | 3127.9 | 54       |
| 1386.8         | 25      |        |          | 1377.6         | 25      |        |          |
| 1398.6         | 24      |        |          | 1381.1         | 24      |        |          |
| 1406.2         | 23      |        |          | 1387.9         | 23      |        |          |
| 1428.4         | 22      |        |          | 1418.2         | 22      |        |          |
| 1438.0         | 21      |        |          | 1426.7         | 21      |        |          |
| 1448.1         | 20      |        |          | 1443.9         | 20      |        |          |
| 1462.2         | 19      |        |          | 1463.7         | 19      |        |          |
| 1492.9         | 18      |        |          | 1480.6         | 18      |        |          |
| 1531.3         | 17      |        |          | 1492.2         | 17      |        |          |
| 1557.6         | 16      |        |          | 1545.0         | 16      |        |          |
| 1602.8         | 15      |        |          | 1576.6         | 15      |        |          |
| 1639.3         | 14      |        |          | 1601.1         | 14      |        |          |
| 1693.1         | 13      |        |          | 1649.8         | 13      |        |          |
| 1712.8         | 12      |        |          | 1726.7         | 12      |        |          |
| 1846.5         | 11      |        |          | 1806.1         | 11      |        |          |
| 1905.1         | 10      |        |          | 1863.7         | 10      |        |          |
| 3063.9         | 9       |        |          | 3050.1         | 9       |        |          |
| 3064.5         | 8       |        |          | 3056.1         | 8       |        |          |
| 3183.3         | 7       |        |          | 3182.4         | 7       |        |          |
| 3185.9         | 6       |        |          | 3184.8         | 6       |        |          |
| 3214.9         | 5       |        |          | 3210.0         | 5       |        |          |
| 3239.5         | 4       |        |          | 3228.0         | 4       |        |          |
| 3455.3         | 3       |        |          | 3554.6         | 3       |        |          |
| 3593.6         | 2       |        |          | 3600.2         | 2       |        |          |
| 3615.4         | 1       |        |          | 3612.6         | 1       |        |          |

**Table S3.** Optimized geometries for the  $S_0$  and  $S_1$  states of the  $M^+LC(O4)$  isomers,  $H^+LC(N5)$  and  $H^+LC(O4)$ , LC, and iso-LC.

**(a)  $Li^+LC(O4)$**

| $S_0$ |       |       |       | $S_1$ |       |       |       |
|-------|-------|-------|-------|-------|-------|-------|-------|
|       | x     | y     | z     |       | x     | y     | z     |
| C     | -3.17 | -0.46 | 0.00  | C     | -3.22 | -0.44 | 0.00  |
| C     | -1.94 | -1.08 | 0.00  | C     | -1.94 | -1.06 | 0.00  |
| C     | -0.74 | -0.34 | 0.00  | C     | -0.71 | -0.36 | 0.00  |
| C     | -0.79 | 1.10  | 0.00  | C     | -0.77 | 1.04  | 0.00  |
| C     | -2.06 | 1.72  | 0.00  | C     | -2.06 | 1.67  | 0.00  |
| C     | -3.23 | 0.99  | 0.00  | C     | -3.28 | 0.97  | 0.00  |
| C     | 1.47  | 1.22  | 0.00  | C     | 1.47  | 1.19  | 0.00  |
| C     | 1.54  | -0.19 | 0.00  | C     | 1.57  | -0.23 | 0.00  |
| C     | 2.85  | -0.86 | 0.00  | C     | 2.87  | -0.85 | 0.00  |
| C     | 3.91  | 1.38  | 0.00  | C     | 3.92  | 1.37  | 0.00  |
| H     | -1.89 | -2.17 | 0.00  | H     | -1.90 | -2.16 | 0.00  |
| H     | -2.08 | 2.81  | 0.00  | H     | -2.07 | 2.76  | 0.00  |
| H     | 4.85  | -0.45 | 0.00  | H     | 4.88  | -0.43 | 0.00  |
| H     | 2.59  | 2.94  | 0.00  | H     | 2.57  | 2.92  | 0.00  |
| N     | 0.32  | 1.86  | 0.00  | N     | 0.32  | 1.85  | 0.00  |
| N     | 2.64  | 1.93  | 0.00  | N     | 2.62  | 1.90  | 0.00  |
| N     | 3.92  | -0.04 | 0.00  | N     | 3.95  | -0.01 | 0.00  |
| N     | 0.46  | -0.96 | 0.00  | N     | 0.48  | -1.04 | 0.00  |
| O     | 2.95  | -2.10 | 0.00  | O     | 3.01  | -2.10 | 0.00  |
| O     | 4.92  | 2.01  | 0.00  | O     | 4.90  | 2.07  | 0.00  |
| C     | -4.55 | 1.67  | 0.00  | C     | -4.58 | 1.69  | 0.00  |
| H     | -5.15 | 1.39  | 0.88  | H     | -5.19 | 1.43  | 0.88  |
| H     | -4.44 | 2.77  | 0.00  | H     | -4.44 | 2.78  | 0.00  |
| H     | -5.15 | 1.39  | -0.88 | H     | -5.19 | 1.43  | -0.88 |
| C     | -4.43 | -1.25 | 0.00  | C     | -4.45 | -1.27 | 0.00  |
| H     | -5.05 | -1.02 | 0.88  | H     | -5.08 | -1.04 | 0.88  |
| H     | -5.05 | -1.02 | -0.88 | H     | -5.08 | -1.04 | -0.88 |
| H     | -4.23 | -2.33 | 0.00  | H     | -4.23 | -2.34 | 0.00  |
| Li    | 1.24  | -2.87 | 0.00  | Li    | 1.33  | -2.86 | 0.00  |

**(b)  $Na^+LC(O4)$**

| $S_0$ |       |       |       | $S_1$ |       |       |       |
|-------|-------|-------|-------|-------|-------|-------|-------|
|       | x     | y     | z     |       | x     | y     | z     |
| C     | -3.43 | 0.49  | 0.00  | C     | 3.32  | 0.28  | 0.00  |
| C     | -2.21 | 1.13  | 0.00  | C     | 2.02  | 0.86  | 0.00  |
| C     | -1.00 | 0.41  | 0.00  | C     | 0.82  | 0.12  | 0.00  |
| C     | -1.04 | -1.03 | 0.00  | C     | 0.94  | -1.28 | 0.00  |
| C     | -2.30 | -1.67 | 0.00  | C     | 2.25  | -1.86 | 0.00  |
| C     | -3.47 | -0.95 | 0.00  | C     | 3.44  | -1.12 | 0.00  |
| C     | 1.22  | -1.11 | 0.00  | C     | -1.30 | -1.50 | 0.00  |
| C     | 1.29  | 0.30  | 0.00  | C     | -1.46 | -0.07 | 0.00  |
| C     | 2.60  | 0.97  | 0.00  | C     | -2.80 | 0.48  | 0.00  |
| C     | 3.66  | -1.28 | 0.00  | C     | -3.73 | -1.81 | 0.00  |
| H     | -2.17 | 2.22  | 0.00  | H     | 1.95  | 1.95  | 0.00  |
| H     | -2.31 | -2.76 | 0.00  | H     | 2.29  | -2.96 | 0.00  |
| H     | 4.60  | 0.55  | 0.00  | H     | -4.78 | -0.06 | 0.00  |
| H     | 2.34  | -2.84 | 0.00  | H     | -2.30 | -3.28 | 0.00  |
| N     | 0.08  | -1.77 | 0.00  | N     | -0.13 | -2.12 | 0.00  |
| N     | 2.40  | -1.83 | 0.00  | N     | -2.41 | -2.27 | 0.00  |
| N     | 3.67  | 0.13  | 0.00  | N     | -3.84 | -0.44 | 0.00  |
| N     | 0.19  | 1.05  | 0.00  | N     | -0.39 | 0.76  | 0.00  |
| O     | 2.73  | 2.20  | 0.00  | O     | -3.05 | 1.70  | 0.00  |
| O     | 4.68  | -1.91 | 0.00  | O     | -4.67 | -2.56 | 0.00  |
| C     | -4.79 | -1.65 | 0.00  | C     | 4.77  | -1.79 | 0.00  |
| H     | -5.39 | -1.38 | -0.88 | H     | 5.36  | -1.51 | 0.88  |
| H     | -4.67 | -2.74 | 0.00  | H     | 4.66  | -2.89 | 0.00  |
| H     | -5.39 | -1.38 | 0.88  | H     | 5.36  | -1.51 | -0.88 |
| C     | -4.71 | 1.28  | 0.00  | C     | 4.52  | 1.16  | 0.00  |
| H     | -5.32 | 1.04  | -0.88 | H     | 5.16  | 0.96  | 0.88  |
| H     | -5.32 | 1.04  | 0.88  | H     | 5.16  | 0.96  | -0.88 |
| H     | -4.52 | 2.36  | 0.00  | H     | 4.26  | 2.22  | 0.00  |
| Na    | 0.88  | 3.38  | 0.00  | Na    | -1.29 | 2.97  | 0.00  |

**(c) K<sup>+</sup>LC(O4)**

| S <sub>0</sub> |       |       |       | S <sub>1</sub> |       |       |       |
|----------------|-------|-------|-------|----------------|-------|-------|-------|
|                | x     | y     | z     |                | x     | y     | z     |
| C              | -3.46 | 0.38  | 0.00  | C              | -3.42 | 0.15  | 0.00  |
| C              | -2.22 | 0.97  | 0.00  | C              | -2.09 | 0.67  | 0.00  |
| C              | -1.03 | 0.20  | 0.00  | C              | -0.93 | -0.14 | 0.00  |
| C              | -1.13 | -1.23 | 0.00  | C              | -1.12 | -1.53 | 0.00  |
| C              | -2.42 | -1.82 | 0.00  | C              | -2.46 | -2.04 | 0.00  |
| C              | -3.56 | -1.06 | 0.00  | C              | -3.61 | -1.24 | 0.00  |
| C              | 1.13  | -1.40 | 0.00  | C              | 1.10  | -1.86 | 0.00  |
| C              | 1.24  | 0.02  | 0.00  | C              | 1.34  | -0.44 | 0.00  |
| C              | 2.58  | 0.63  | 0.00  | C              | 2.70  | 0.03  | 0.00  |
| C              | 3.55  | -1.66 | 0.00  | C              | 3.51  | -2.31 | 0.00  |
| H              | -2.14 | 2.06  | 0.00  | H              | -1.96 | 1.75  | 0.00  |
| H              | -2.47 | -2.91 | 0.00  | H              | -2.56 | -3.13 | 0.00  |
| H              | 4.56  | 0.12  | 0.00  | H              | 4.65  | -0.62 | 0.00  |
| H              | 2.17  | -3.17 | 0.00  | H              | 1.99  | -3.70 | 0.00  |
| N              | -0.04 | -2.02 | 0.00  | N              | -0.10 | -2.42 | 0.00  |
| N              | 2.27  | -2.16 | 0.00  | N              | 2.17  | -2.70 | 0.00  |
| N              | 3.62  | -0.26 | 0.00  | N              | 3.69  | -0.94 | 0.00  |
| N              | 0.18  | 0.80  | 0.00  | N              | 0.31  | 0.44  | 0.00  |
| O              | 2.78  | 1.84  | 0.00  | O              | 3.03  | 1.23  | 0.00  |
| O              | 4.54  | -2.34 | 0.00  | O              | 4.41  | -3.12 | 0.00  |
| C              | -4.91 | -1.71 | 0.00  | C              | -4.97 | -1.84 | 0.00  |
| H              | -5.49 | -1.41 | -0.88 | H              | -5.55 | -1.53 | -0.88 |
| H              | -4.82 | -2.80 | 0.00  | H              | -4.93 | -2.94 | 0.00  |
| H              | -5.49 | -1.41 | 0.88  | H              | -5.55 | -1.53 | 0.88  |
| C              | -4.71 | 1.21  | 0.00  | C              | -4.57 | 1.09  | 0.00  |
| H              | -5.33 | 1.00  | -0.88 | H              | -5.22 | 0.92  | -0.88 |
| H              | -5.33 | 1.00  | 0.88  | H              | -5.22 | 0.92  | 0.88  |
| H              | -4.47 | 2.29  | 0.00  | H              | -4.25 | 2.14  | 0.00  |
| K              | 0.93  | 3.55  | 0.00  | K              | 1.36  | 3.04  | 0.00  |

**(d) Rb<sup>+</sup>LC(O4)**

| S <sub>0</sub> |       |       |       | S <sub>1</sub> |       |       |       |
|----------------|-------|-------|-------|----------------|-------|-------|-------|
|                | x     | y     | z     |                | x     | y     | z     |
| C              | 3.54  | -0.03 | 0.00  | C              | -3.62 | 0.48  | 0.00  |
| C              | 2.22  | -0.41 | 0.00  | C              | -2.24 | 0.87  | 0.00  |
| C              | 1.17  | 0.55  | 0.00  | C              | -1.16 | -0.03 | 0.00  |
| C              | 1.50  | 1.94  | 0.00  | C              | -1.48 | -1.40 | 0.00  |
| C              | 2.87  | 2.32  | 0.00  | C              | -2.86 | -1.79 | 0.00  |
| C              | 3.87  | 1.38  | 0.00  | C              | -3.93 | -0.89 | 0.00  |
| C              | -0.70 | 2.48  | 0.00  | C              | 0.70  | -1.93 | 0.00  |
| C              | -1.04 | 1.10  | 0.00  | C              | 1.07  | -0.54 | 0.00  |
| C              | -2.47 | 0.71  | 0.00  | C              | 2.47  | -0.19 | 0.00  |
| C              | -3.05 | 3.14  | 0.00  | C              | 3.06  | -2.60 | 0.00  |
| H              | 1.96  | -1.47 | 0.00  | H              | -2.02 | 1.94  | 0.00  |
| H              | 3.09  | 3.39  | 0.00  | H              | -3.05 | -2.87 | 0.00  |
| H              | -4.33 | 1.54  | 0.00  | H              | 4.35  | -1.02 | 0.00  |
| H              | -1.44 | 4.40  | 0.00  | H              | 1.42  | -3.84 | 0.00  |
| N              | 0.55  | 2.90  | 0.00  | N              | -0.54 | -2.38 | 0.00  |
| N              | -1.70 | 3.42  | 0.00  | N              | 1.69  | -2.86 | 0.00  |
| N              | -3.34 | 1.76  | 0.00  | N              | 3.36  | -1.25 | 0.00  |
| N              | -0.12 | 0.15  | 0.00  | N              | 0.12  | 0.43  | 0.00  |
| O              | -2.86 | -0.45 | 0.00  | O              | 2.91  | 0.97  | 0.00  |
| O              | -3.91 | 3.97  | 0.00  | O              | 3.88  | -3.48 | 0.00  |
| C              | 5.31  | 1.80  | 0.00  | C              | -5.35 | -1.37 | 0.00  |
| H              | 5.84  | 1.41  | -0.88 | H              | -5.89 | -1.00 | -0.88 |
| H              | 5.40  | 2.90  | 0.00  | H              | -5.40 | -2.46 | 0.00  |
| H              | 5.84  | 1.41  | 0.88  | H              | -5.89 | -1.00 | 0.88  |
| C              | 4.63  | -1.05 | 0.00  | C              | -4.68 | 1.52  | 0.00  |
| H              | 5.28  | -0.94 | -0.88 | H              | -5.34 | 1.41  | -0.88 |
| H              | 5.28  | -0.94 | 0.88  | H              | -5.34 | 1.41  | 0.88  |
| H              | 4.23  | -2.07 | 0.00  | H              | -4.27 | 2.54  | 0.00  |
| Rb             | -1.33 | -2.61 | 0.00  | Rb             | 1.43  | 3.09  | 0.00  |

(e) Cs<sup>+</sup>LC(O4)

| S <sub>0</sub> |       |       |       | S <sub>1</sub> |       |       |       |
|----------------|-------|-------|-------|----------------|-------|-------|-------|
|                | x     | y     | z     |                | x     | y     | z     |
| C              | -3.75 | -0.21 | 0.00  | C              | -3.85 | -0.30 | 0.00  |
| C              | -2.38 | -0.37 | 0.00  | C              | -2.43 | -0.43 | 0.00  |
| C              | -1.50 | 0.74  | 0.00  | C              | -1.54 | 0.66  | 0.00  |
| C              | -2.05 | 2.06  | 0.00  | C              | -2.12 | 1.95  | 0.00  |
| C              | -3.46 | 2.21  | 0.00  | C              | -3.54 | 2.07  | 0.00  |
| C              | -4.30 | 1.12  | 0.00  | C              | -4.42 | 0.98  | 0.00  |
| C              | 0.03  | 2.94  | 0.00  | C              | -0.07 | 2.88  | 0.00  |
| C              | 0.60  | 1.63  | 0.00  | C              | 0.55  | 1.58  | 0.00  |
| C              | 2.06  | 1.48  | 0.00  | C              | 1.99  | 1.50  | 0.00  |
| C              | 2.25  | 3.97  | 0.00  | C              | 2.12  | 3.98  | 0.00  |
| H              | -1.95 | -1.38 | 0.00  | H              | -2.01 | -1.44 | 0.00  |
| H              | -3.85 | 3.23  | 0.00  | H              | -3.94 | 3.09  | 0.00  |
| H              | 3.77  | 2.60  | 0.00  | H              | 3.69  | 2.68  | 0.00  |
| H              | 0.46  | 4.96  | 0.00  | H              | 0.28  | 4.89  | 0.00  |
| N              | -1.26 | 3.16  | 0.00  | N              | -1.38 | 3.09  | 0.00  |
| N              | 0.87  | 4.03  | 0.00  | N              | 0.72  | 3.98  | 0.00  |
| N              | 2.76  | 2.66  | 0.00  | N              | 2.67  | 2.72  | 0.00  |
| N              | -0.16 | 0.55  | 0.00  | N              | -0.19 | 0.45  | 0.00  |
| O              | 2.64  | 0.40  | 0.00  | O              | 2.65  | 0.45  | 0.00  |
| O              | 2.97  | 4.93  | 0.00  | O              | 2.76  | 5.00  | 0.00  |
| C              | -5.78 | 1.31  | 0.00  | C              | -5.90 | 1.18  | 0.00  |
| H              | -6.24 | 0.84  | 0.88  | H              | -6.37 | 0.72  | 0.88  |
| H              | -6.05 | 2.38  | 0.00  | H              | -6.16 | 2.25  | 0.00  |
| H              | -6.24 | 0.84  | -0.88 | H              | -6.37 | 0.72  | -0.88 |
| C              | -4.66 | -1.40 | 0.00  | C              | -4.70 | -1.53 | 0.00  |
| H              | -5.32 | -1.39 | 0.88  | H              | -5.37 | -1.54 | 0.88  |
| H              | -5.32 | -1.39 | -0.88 | H              | -5.37 | -1.54 | -0.88 |
| H              | -4.10 | -2.34 | 0.00  | H              | -4.11 | -2.45 | 0.00  |
| Cs             | 1.57  | -2.19 | 0.00  | Cs             | 1.70  | -2.11 | 0.00  |

(f) LC

| S <sub>0</sub> |       |       |       | S <sub>2</sub> |       |       |       |
|----------------|-------|-------|-------|----------------|-------|-------|-------|
|                | x     | y     | z     |                | x     | y     | z     |
| C              | -3.38 | 0.66  | 0.00  | C              | -3.41 | 0.63  | 0.00  |
| C              | -2.18 | 1.34  | 0.00  | C              | -2.16 | 1.33  | 0.00  |
| C              | -0.94 | 0.65  | 0.00  | C              | -0.92 | 0.68  | 0.00  |
| C              | -0.94 | -0.78 | 0.00  | C              | -0.93 | -0.74 | 0.00  |
| C              | -2.18 | -1.46 | 0.00  | C              | -2.18 | -1.43 | 0.00  |
| C              | -3.37 | -0.78 | 0.00  | C              | -3.42 | -0.77 | 0.00  |
| C              | 1.32  | -0.76 | 0.00  | C              | 1.32  | -0.73 | 0.00  |
| C              | 1.33  | 0.66  | 0.00  | C              | 1.36  | 0.70  | 0.00  |
| C              | 2.62  | 1.40  | 0.00  | C              | 2.64  | 1.38  | 0.00  |
| C              | 3.77  | -0.84 | 0.00  | C              | 3.77  | -0.85 | 0.00  |
| H              | -2.14 | 2.43  | 0.00  | H              | -2.15 | 2.42  | 0.00  |
| H              | -2.15 | -2.55 | 0.00  | H              | -2.14 | -2.52 | 0.00  |
| H              | 4.64  | 1.00  | 0.00  | H              | 4.67  | 0.96  | 0.00  |
| H              | 2.51  | -2.45 | 0.00  | H              | 2.44  | -2.43 | 0.00  |
| N              | 0.22  | -1.48 | 0.00  | N              | 0.21  | -1.47 | 0.00  |
| N              | 2.52  | -1.43 | 0.00  | N              | 2.49  | -1.42 | 0.00  |
| N              | 3.73  | 0.55  | 0.00  | N              | 3.76  | 0.51  | 0.00  |
| N              | 0.21  | 1.36  | 0.00  | N              | 0.22  | 1.42  | 0.00  |
| O              | 2.74  | 2.60  | 0.00  | O              | 2.83  | 2.58  | 0.00  |
| O              | 4.80  | -1.46 | 0.00  | O              | 4.76  | -1.56 | 0.00  |
| C              | -4.67 | -1.53 | 0.00  | C              | -4.71 | -1.54 | 0.00  |
| H              | -5.28 | -1.27 | -0.88 | H              | -5.32 | -1.31 | -0.88 |
| H              | -4.50 | -2.61 | 0.00  | H              | -4.52 | -2.63 | 0.00  |
| H              | -5.28 | -1.27 | 0.88  | H              | -5.32 | -1.31 | 0.88  |
| C              | -4.68 | 1.41  | 0.00  | C              | -4.68 | 1.42  | 0.00  |
| H              | -5.29 | 1.16  | -0.88 | H              | -5.30 | 1.17  | -0.88 |
| H              | -5.29 | 1.16  | 0.88  | H              | -5.30 | 1.17  | 0.88  |
| H              | -4.51 | 2.49  | 0.00  | H              | -4.50 | 2.50  | 0.00  |

e) iso-LC

| $S_0$ |       |       |       | $S_1$ |       |       |       |
|-------|-------|-------|-------|-------|-------|-------|-------|
|       | x     | y     | z     |       | x     | y     | z     |
| C     | -3.37 | 0.68  | 0.00  | C     | -3.37 | 0.66  | 0.00  |
| C     | -2.15 | 1.33  | 0.00  | C     | -2.16 | 1.35  | 0.00  |
| C     | -0.93 | 0.63  | 0.00  | C     | -0.91 | 0.70  | 0.00  |
| C     | -0.96 | -0.78 | 0.00  | C     | -0.96 | -0.74 | 0.00  |
| C     | -2.19 | -1.45 | 0.00  | C     | -2.18 | -1.44 | 0.00  |
| C     | -3.38 | -0.74 | 0.00  | C     | -3.39 | -0.77 | 0.00  |
| C     | 1.45  | -0.80 | 0.00  | C     | 1.42  | -0.72 | 0.00  |
| C     | 1.36  | 0.66  | 0.00  | C     | 1.39  | 0.70  | 0.00  |
| C     | 2.66  | 1.39  | 0.00  | C     | 2.67  | 1.38  | 0.00  |
| C     | 3.75  | -0.87 | 0.00  | C     | 3.74  | -0.89 | 0.00  |
| H     | -2.09 | 2.42  | 0.00  | H     | -2.14 | 2.44  | 0.00  |
| H     | -2.20 | -2.55 | 0.00  | H     | -2.16 | -2.53 | 0.00  |
| H     | 4.66  | 0.97  | 0.00  | H     | 4.68  | 0.92  | 0.00  |
| N     | 0.24  | -1.44 | 0.00  | N     | 0.24  | -1.39 | 0.00  |
| N     | 2.53  | -1.53 | 0.00  | N     | 2.49  | -1.52 | 0.00  |
| N     | 3.74  | 0.54  | 0.00  | N     | 3.76  | 0.48  | 0.00  |
| N     | 0.25  | 1.33  | 0.00  | N     | 0.23  | 1.41  | 0.00  |
| O     | 2.76  | 2.60  | 0.00  | O     | 2.87  | 2.58  | 0.00  |
| O     | 4.81  | -1.45 | 0.00  | O     | 4.76  | -1.56 | 0.00  |
| C     | -4.69 | -1.48 | 0.00  | C     | -4.68 | -1.52 | 0.00  |
| H     | -5.29 | -1.22 | -0.88 | H     | -5.30 | -1.28 | -0.88 |
| H     | -4.54 | -2.57 | 0.00  | H     | -4.51 | -2.61 | 0.00  |
| H     | -5.29 | -1.22 | 0.88  | H     | -5.30 | -1.28 | 0.88  |
| C     | -4.65 | 1.45  | 0.00  | C     | -4.66 | 1.42  | 0.00  |
| H     | -5.27 | 1.22  | -0.88 | H     | -5.27 | 1.17  | -0.88 |
| H     | -5.27 | 1.22  | 0.88  | H     | -5.27 | 1.17  | 0.88  |
| H     | -4.46 | 2.54  | 0.00  | H     | -4.49 | 2.51  | 0.00  |
| H     | 0.28  | -2.45 | 0.00  | H     | 0.31  | -2.40 | 0.00  |

f)  $H^+LC(N5)$

| $S_0$ |       |       |       | $S_1$ |       |       |       |
|-------|-------|-------|-------|-------|-------|-------|-------|
|       | x     | y     | z     |       | x     | y     | z     |
| C     | -3.38 | 0.65  | 0.00  | C     | -3.44 | 0.62  | 0.00  |
| C     | -2.19 | 1.34  | 0.00  | C     | -2.20 | 1.31  | 0.00  |
| C     | -0.98 | 0.64  | 0.00  | C     | -0.96 | 0.64  | 0.00  |
| C     | -0.94 | -0.80 | 0.00  | C     | -0.92 | -0.76 | 0.00  |
| C     | -2.18 | -1.48 | 0.00  | C     | -2.18 | -1.44 | 0.00  |
| C     | -3.38 | -0.80 | 0.00  | C     | -3.43 | -0.78 | 0.00  |
| C     | 1.34  | -0.81 | 0.00  | C     | 1.34  | -0.79 | 0.00  |
| C     | 1.37  | 0.59  | 0.00  | C     | 1.40  | 0.62  | 0.00  |
| C     | 2.63  | 1.37  | 0.00  | C     | 2.65  | 1.36  | 0.00  |
| C     | 3.79  | -0.83 | 0.00  | C     | 3.80  | -0.83 | 0.00  |
| H     | -2.19 | 2.44  | 0.00  | H     | -2.21 | 2.40  | 0.00  |
| H     | -2.15 | -2.57 | 0.00  | H     | -2.14 | -2.53 | 0.00  |
| H     | 4.65  | 1.03  | 0.00  | H     | 4.68  | 1.01  | 0.00  |
| H     | 2.56  | -2.47 | 0.00  | H     | 2.54  | -2.46 | 0.00  |
| N     | 0.21  | -1.49 | 0.00  | N     | 0.22  | -1.50 | 0.00  |
| N     | 2.55  | -1.46 | 0.00  | N     | 2.53  | -1.44 | 0.00  |
| N     | 3.74  | 0.57  | 0.00  | N     | 3.77  | 0.55  | 0.00  |
| N     | 0.23  | 1.26  | 0.00  | N     | 0.24  | 1.31  | 0.00  |
| O     | 2.62  | 2.58  | 0.00  | O     | 2.68  | 2.58  | 0.00  |
| O     | 4.82  | -1.44 | 0.00  | O     | 4.81  | -1.49 | 0.00  |
| C     | -4.67 | -1.54 | 0.00  | C     | -4.69 | -1.57 | 0.00  |
| H     | -5.28 | -1.28 | -0.88 | H     | -5.31 | -1.33 | -0.88 |
| H     | -4.51 | -2.63 | 0.00  | H     | -4.50 | -2.65 | 0.00  |
| H     | -5.28 | -1.28 | 0.88  | H     | -5.31 | -1.33 | 0.88  |
| C     | -4.68 | 1.39  | 0.00  | C     | -4.72 | 1.39  | 0.00  |
| H     | -5.29 | 1.12  | -0.88 | H     | -5.33 | 1.14  | -0.88 |
| H     | -5.29 | 1.12  | 0.88  | H     | -5.33 | 1.14  | 0.88  |
| H     | -4.54 | 2.47  | 0.00  | H     | -4.55 | 2.48  | 0.00  |
| H     | 0.32  | 2.28  | 0.00  | H     | 0.32  | 2.33  | 0.00  |

g) H<sup>+</sup>LC(O4)

| S <sub>0</sub> |       |       |       | S <sub>1</sub> |       |       |       |
|----------------|-------|-------|-------|----------------|-------|-------|-------|
|                | x     | y     | z     |                | x     | y     | z     |
| C              | -3.38 | 0.66  | 0.00  | C              | -3.42 | 0.63  | 0.00  |
| C              | -2.18 | 1.34  | 0.00  | C              | -2.17 | 1.31  | 0.00  |
| C              | -0.94 | 0.64  | 0.00  | C              | -0.93 | 0.65  | 0.00  |
| C              | -0.94 | -0.81 | 0.00  | C              | -0.94 | -0.75 | 0.00  |
| C              | -2.18 | -1.48 | 0.00  | C              | -2.21 | -1.44 | 0.00  |
| C              | -3.37 | -0.79 | 0.00  | C              | -3.44 | -0.77 | 0.00  |
| C              | 1.32  | -0.83 | 0.00  | C              | 1.31  | -0.81 | 0.00  |
| C              | 1.31  | 0.58  | 0.00  | C              | 1.34  | 0.62  | 0.00  |
| C              | 2.56  | 1.27  | 0.00  | C              | 2.60  | 1.26  | 0.00  |
| C              | 3.76  | -0.86 | 0.00  | C              | 3.77  | -0.87 | 0.00  |
| H              | -2.15 | 2.43  | 0.00  | H              | -2.16 | 2.41  | 0.00  |
| H              | -2.16 | -2.57 | 0.00  | H              | -2.17 | -2.53 | 0.00  |
| H              | 4.59  | 1.04  | 0.00  | H              | 4.64  | 0.99  | 0.00  |
| H              | 2.54  | -2.49 | 0.00  | H              | 2.50  | -2.49 | 0.00  |
| N              | 0.20  | -1.53 | 0.00  | N              | 0.19  | -1.51 | 0.00  |
| N              | 2.53  | -1.48 | 0.00  | N              | 2.50  | -1.47 | 0.00  |
| N              | 3.69  | 0.57  | 0.00  | N              | 3.73  | 0.52  | 0.00  |
| N              | 0.21  | 1.32  | 0.00  | N              | 0.23  | 1.37  | 0.00  |
| O              | 2.62  | 2.57  | 0.00  | O              | 2.72  | 2.56  | 0.00  |
| O              | 4.82  | -1.41 | 0.00  | O              | 4.79  | -1.50 | 0.00  |
| C              | -4.67 | -1.53 | 0.00  | C              | -4.72 | -1.54 | 0.00  |
| H              | -5.27 | -1.26 | -0.88 | H              | -5.33 | -1.29 | -0.88 |
| H              | -4.52 | -2.61 | 0.00  | H              | -4.54 | -2.62 | 0.00  |
| H              | -5.27 | -1.26 | 0.88  | H              | -5.33 | -1.29 | 0.88  |
| C              | -4.67 | 1.40  | 0.00  | C              | -4.69 | 1.42  | 0.00  |
| H              | -5.28 | 1.14  | -0.88 | H              | -5.30 | 1.17  | -0.88 |
| H              | -5.28 | 1.14  | 0.88  | H              | -5.30 | 1.17  | 0.88  |
| H              | -4.52 | 2.49  | 0.00  | H              | -4.51 | 2.50  | 0.00  |
| H              | 1.68  | 2.88  | 0.00  | H              | 1.80  | 2.92  | 0.00  |
